1 **TITLE: The ultrastructural nature of human oocytes' cytoplasmatic abnormalities and the**  
2 **role of cytoskeleton dysfunction**

3 **AUTHORS AND AFFILIATIONS:**

4 Martina Tatíčková<sup>1</sup>, Zuzana Trebichalská<sup>1</sup>, Drahomíra Kyjovská<sup>2</sup>, Pavel Otevřel<sup>2</sup>, Soňa  
5 Kloudová<sup>2</sup>, Zuzana Holubcová<sup>1,2</sup>

6 <sup>1</sup> Department of Histology and Embryology, Faculty of Medicine, Masaryk University, Brno, Czech  
7 Republic

8 <sup>2</sup> Reprofit International, Clinic of Reproductive Medicine, Czech Republic

9

10 **GRANT SUPPORT:**

11 Grant Agency of the Czech Republic (GJ19-14990Y) and internal funds of Masaryk University  
12 (MUNI/A/1398/2021, MUNI/A/1301/2022).

13

14 **CORRESPONDENCE:** Zuzana Holubcová, Masaryk University Campus – building F01B1,  
15 Kamenice 3, 625 00 Brno, [zholub@med.muni.cz](mailto:zholub@med.muni.cz), ORCID ID: 0000-0002-4658-6161

16

17 **RUNNING TITLE:** Ultrastructure of dysmorphic human oocytes.

18

19 **SUMMARY SENTENCE:**

20 Ultrastructural analysis of eggs exhibiting cytoplasmic abnormalities combined with inhibition  
21 experiments indicates that dysfunction of the actin network might be involved in the  
22 development of oocyte dysmorphisms.

23

24 **KEYWORDS:** human oocyte, dysmorphism, oocyte abnormalities, refractile bodies, electron  
25 microscopy, egg quality, cytoskeleton, actin

26

27 **ABSTRACT**

28 Egg quality is a limiting factor of female fertility and assisted reproductive technology (ART)  
29 success. Oocytes recovered from hyperstimulated ovaries often display morphological anomalies  
30 suspected to compromise their fertilization and developmental potential. Knowledge of (ab)normal  
31 oocyte's intracellular organization is vital to establish reliable criteria for morphological evaluation  
32 of oocytes intended for in vitro fertilization (IVF). Here, we investigated the fine morphology of 22  
33 dysmorphic IVF oocytes exhibiting different types of cytoplasmic irregularities, namely (1)  
34 refractile bodies, (2) centrally-located cytoplasmic granularity (CLCG), (3) smooth endoplasmic  
35 reticulum (SER) disc, and (4) vacuoles. Transmission electron microscopy (TEM) revealed the  
36 structural basis of these aberrations and indicated that the underlying cause of two of the studied  
37 morphotypes was inordinate organelle clustering. To address the mechanism required for  
38 accurate organelle positioning, we used cytoskeleton-targeting chemical compounds and  
39 performed a series of inhibition experiments involving a total of 133 human oocytes maturing in  
40 vitro. Fluorescence and electron microscopy showed that disruption of actin, not microtubules,  
41 led to the aggregation of subcellular structures resembling the morphological pattern seen in  
42 abnormal oocytes. These results imply that actin serves as a regulator of organelle distribution  
43 during human oocyte maturation. The ultrastructural analogy between dysmorphic eggs retrieved  
44 in IVF cycles and oocytes, in which actin network integrity was perturbed, suggests that  
45 dysfunction of the actin cytoskeleton might be implicated in generating common cytoplasmic  
46 aberrations. Knowledge of human oocytes' inner workings and the origin of morphological  
47 abnormalities is a step forward to more objective egg quality assessment in clinical practice.

48

49

50

## 51 INTRODUCTION

52 Eggs are commonly referred to as good or bad according to their chromosomal content, while  
53 the quality-determination role of its enormously large cytoplasm is less recognized. As the oocyte  
54 grows, the cytoplasm stockpiles cellular material and molecular factors needed to support embryo  
55 metabolism after fertilization. The final stage of egg development, oocyte maturation, is marked  
56 by structural and biochemical modifications, rendering the oocyte capable of completing meiotic  
57 segregation, fertilization, and early embryogenesis (1-3). Human eggs are well-known to vary in  
58 their fertilization and developmental competence. The technical and ethical issues related to the  
59 provision of human oocytes for research are limiting the study of the fundamental biology of these  
60 unique cells and exploration of factors affecting their quality.

61 In ART practice, female gametes are harvested from preovulatory follicles, and morphology  
62 of denuded oocytes intended for intracytoplasmic sperm injection (ICSI) or vitrification is  
63 evaluated by conventional stereomicroscopic examination. Preovulatory oocytes retrieved in  
64 controlled ovarian stimulation (COS) cycles tend to differ in their morphological appearance,  
65 maturation grade, and developmental capacity. The good-quality mature egg is characterized by  
66 a spherical shape, a single, normal-sized polar body (PB) and perivitelline space (PVS), a uniform  
67 zona pellucida (ZP), and a pale cytoplasm with homogenous texture and smooth appearance (4).  
68 However, the oocytes derived from IVF patients often deviate from this ideal picture. Hormonally-  
69 primed follicles might occasionally contain giant or misshaped oocytes. Remarkably big or  
70 fragmented PB, atypical ZP, and large or small PVS are collectively termed extracellular defects.  
71 The most common cytoplasmic irregularities include refractile bodies, increased granularity of  
72 ooplasm, and vacuoles. On the other hand, a smooth disc-shape structure disrupting cytoplasmic  
73 texture in phase contrast is encountered only occasionally. An overview of dysmorphic  
74 phenotypes is available in the literature, but their biological significance is unclear (5-7).

75 Multiple studies aimed to evaluate the relationship between oocyte morphology and IVF  
76 outcome. However, the published evidence is controversial. Some authors reported that abnormal  
77 oocytes have a lower chance of producing transferable embryos and healthy pregnancies (8-12),  
78 but others found no correlation between oocyte morphology and its developmental capacity (13-  
79 16). The conflicting data might be explained by inconsistent dysmorphic patterns' classification  
80 and different study endpoints. Some investigators focused on a single morphotype only, whereas  
81 others considered multiple abnormal patterns. The interpretation of results is further complicated  
82 by the fact that multiple cellular aberrations may coincide in one cell; thus, their individual impact  
83 on oocyte quality cannot be readily dissected (17). Meta-analysis, which drew together results  
84 from 14 studies, concluded that the probability of an oocyte becoming fertilized is significantly  
85 reduced by the presence of a large PB, large PVS, refractile bodies, and vacuoles (18). An  
86 international consent meeting of ART experts attempted to set standards for egg and embryo  
87 features assessment in clinical practice (4). Nevertheless, there is still considerable ambiguity  
88 regarding the definition and predictive value of distinct morphotypes. Without clearly defined  
89 classification criteria and widely accepted guidelines, no deselection of observed morphological  
90 abnormalities is routinely applied in clinical laboratories, and all collected metaphase MII (MII)  
91 oocytes are commonly used for ICSI or cryopreservation.

92 Unravelling the structural bases of morphological anomalies is necessary to determine their  
93 impact on oocyte metabolism and developmental competence. Nevertheless, the documentation  
94 of dysmorphic egg ultrastructure is scarce and scattered in literature. In 1990, Van Blerkom was  
95 the first who employed TEM to analyze human oocytes exhibiting aberrant cytoplasmic features  
96 (19). His micrographs revealed that large rounded cytoplasmic inclusion with a smooth and flat  
97 appearance is not a plain vacuole, but an enormous aggregate of smooth endoplasmic reticulum  
98 (SER), thereby referred to as a SER disc. The structural character of this anomaly was confirmed  
99 by later studies (11, 20), which also reported that SER-positive oocytes had reduced  
100 developmental capacity. A combination of TEM and spectral imaging showed that refractile

101 bodies, visible as dark specks in phase contrast, are heterogenous clusters of fibrous material,  
102 granular vesicles, and electron-dense lipid substances exerting characteristic autofluorescence  
103 (19, 21). Interestingly, granule-fibrillar inclusions were also found in the interior of atypical granular  
104 vacuoles (6). Collectively, previously published reports cast light on the ultrastructural nature of  
105 the common oocyte abnormalities. However, they did not cover a full spectrum of dysmorphic  
106 phenotypes, and the number of TEM-imaged samples is small.

107 Little is known about the etiology of human oocyte morphological anomalies. Lacking robust  
108 scientific evidence, our views are shaped by anecdotal evidence and incidental findings combined  
109 with theoretical presumptions. The diminished quality of female gametes was linked to an atypical  
110 hormonal profile in IVF patients (20, 22). Therefore, oocyte dysmorphisms are believed to arise  
111 as a suboptimal response to the stimulation regimen. Van Blerkom was fortunate to capture the  
112 rapid formation of the endocytic vacuole in fertilized human ova and proposed that oocyte  
113 vacuolization is caused by an instability of the cellular cortex (19). Observing the growth of the  
114 SER disc during prolonged cultivation of uninseminated eggs Otsuki and colleagues assumed  
115 that it is a sign of aging-related cellular deterioration (20). The popular review postulated that  
116 cytoplasmic granularity is attributed to excessive clustering of oocyte organelles (5).  
117 Nevertheless, ultrastructural data supporting this notion are missing.

118 Oocyte dysmorphisms appear to derive from alteration in the morphologically normal  
119 progression of cytoplasmic development during preovulatory oogenesis. However, no studies  
120 tackled to address molecular mechanisms underlying the emergence of different cytoplasmic  
121 irregularities in developing human oocytes. We have previously mapped out ultrastructural  
122 changes during human oocyte maturation, and our 2D and 3D image data documented major  
123 reorganization of ooplasm in preparation for fertilization (23, 24). Correct positioning and active  
124 movement of organelles within the cytoplasm rely on their interaction with cytoskeleton  
125 components. Thus, actin/microtubule deficiency to orchestrate organelle relocation during meiotic  
126 maturation may underlie the emergence of cytoplasmic abnormalities in IVF oocytes. However,

127 the role of the cytoskeleton in the human oocyte cytoplasmic maturation and the development of  
128 dysmorphic features was not experimentally verified.

129 In this study, we harnessed our experience with electron microscopy of normal human  
130 oocytes (23, 24) and examined the subcellular morphology of dysmorphic female gametes  
131 rejected for ICSI. To elucidate cellular mechanisms implicated in the evolution of cellular  
132 aberrations, we experimentally perturbed cytoskeleton function in oocytes maturing in vitro and  
133 inspected their inner morphology.

134

## 135 **MATERIAL AND METHODS**

### 136 **Source of oocytes**

137 A total of 150 human oocytes from 102 young and healthy egg donors and 5 oocytes from 3  
138 IVF patients were analyzed in this study (Supplementary Table). Women enrolled in the clinical  
139 egg donation program underwent screening for hormonal and genetic factors that could negatively  
140 affect reproduction. Ovarian stimulation and egg retrieval were performed according to the  
141 established clinical protocol described in detail previously (23). The cumulus cells were  
142 enzymolyzed in hyaluronidase (90101, Irvine Scientific), and the meiotic status of each oocyte  
143 was determined under stereomicroscope based on the presence/absence of the germinal vesicle  
144 (GV)/the first polar body (PB). Surplus oocytes unsuitable for ICSI were used for research only if  
145 the donor's written informed consent was obtained. The study was undertaken under ethical  
146 approvals issued by the Ethics Committees of the collaborating academic institution and clinical  
147 unit.

148

### 149 **Oocyte cultivation and cytoskeleton inhibition**

150 Dysmorphic eggs rejected for IVF were handed over for research after denudation and fixed  
151 without further delay. The spare immature oocytes were cultured until noon the next day in the  
152 maturation medium (G-MOPS, Vitrolife) at 37 °C and 5 % oxygen. Perturbation of cytoskeleton

153 during in vitro maturation was achieved by overnight exposure of morphologically normal GV  
154 oocytes to drugs known to interfere with the function of actin network (1  $\mu$ M cytochalasin D,  
155 C8273, Sigma Aldrich; 5  $\mu$ M brefeldin A, B7651, Sigma Aldrich) and microtubules (1  $\mu$ M  
156 paclitaxel, T7402, Sigma Aldrich; 33  $\mu$ M nocodazole, M1404, Sigma Aldrich, 3 different  
157 commercial lots tested). The effect of nocodazole during overnight/short-term culture was  
158 enhanced by 10  $\mu$ M verapamil (V4629, Sigma Aldrich). To verify microtubule depolymerization,  
159 the presence of bipolar meiotic spindle was first confirmed by polarized light microscopy (PLM)  
160 as previously described (25). Then, MII oocytes were subjected to a 1-hour drug treatment  
161 followed by fixation. Control cells were exposed to the corresponding concentrations of DMSO.  
162 All inhibition experiments were carried out without oil overlay to avoid disproportional drug  
163 distribution into oil phase. Stable humidity was ensured by filling an inter-well space with water.

164

### 165 **Electron microscopy**

166 For TEM inspection, oocytes were fixed in 3% glutaraldehyde (G5882, Sigma Aldrich) in 0.1M  
167 cacodylate buffer (C0250, Sigma Aldrich) (pH 7,2 – 7,8) at room temperature overnight. Next,  
168 oocytes were post-fixed with 1% osmium tetroxide (O5500, Sigma Aldrich) in 0.1 M sodium  
169 cacodylate buffer supplemented with 1.5% potassium ferrocyanide (1049821000, Sigma Aldrich)  
170 for 1 hour. Individual samples were mounted into agarose, dehydrated and embedded in epoxy  
171 resin, as described before (23) . Ultrathin sections placed on grids were stained with 1% aqueous  
172 uranyl acetate (Agar Scientific, Stansted, UK) and 3% lead citrate (Sigma Aldrich, St. Louis, USA),  
173 and observed at the FEI Morgagni 268D microscope.

174

### 175 **Fluorescence microscopy**

176 To assess meiotic spindle and chromosome configuration following drug treatment, individual  
177 oocytes were fixed for 60 min at 37°C in 100 mM HEPES (pH 7) titrated with KOH, 50 mM EGTA  
178 (pH 7) titrated with KOH, 10 mM MgSO<sub>4</sub>, 2% formaldehyde (MeOH free) and 0.2% Triton X-100,

179 based on previously published protocol (26). After fixation, oocytes were rinsed in phosphate-  
180 buffered saline supplemented with 0.1% Triton X-100 (PBT) and kept in PBT overnight at 4°C.  
181 For microtubule staining, oocytes were exposed to an anti- $\alpha$ -tubulin antibody (rat monoclonal  
182 MCA78G, Bio-Rad) overnight at 4°C and Alexa-Fluor-633-labelled goat anti-rat antibody (A-  
183 21094, Thermo Fisher Scientific) for 2 hours in the dark and at room temperature. Chromatin was  
184 stained by DAPI (D1306, Thermo Fisher Scientific) and actin filaments by Alexa-Fluor-488 labeled  
185 phalloidin (A12379, Thermo Fisher Scientific) for 1 hour in the dark and at room temperature.  
186 Incubation with primary/secondary antibody and fluorescent dyes were carried out in PBT  
187 supplemented with 3% bovine serum albumin. For mitochondria visualization, live cells were  
188 treated with the fluorescent probe MitoTracker Orange CM-H2TMRos (M7511, Thermo Fisher  
189 Scientific) for 1 hour in the dark and at 37 °C before fixation. Samples were imaged using Zeiss  
190 LSM 800 confocal fluorescence microscope.

191

## 192 **RESULTS**

### 193 **Ultrastructural analysis of dysmorphic oocytes**

194 The fine morphology of 22 dysmorphic oocytes, which exhibited prominent cytoplasmic  
195 abnormalities during stereo microscopy examination, was inspected by TEM. The samples were  
196 derived from 3 IVF patients (30,33 and 42 years old) and 14 healthy egg donors (mean age 28.86  
197  $\pm$  6.20 years). The refractile bodies were the most common cytoplasmic inclusions in our samples  
198 (18 out of 22 oocytes). Vacuoles were observed in 11 samples, and cytoplasmic granularity in 6  
199 samples. Although only 1 oocyte exhibited SER disc under low magnification, TEM analysis  
200 revealed enlarged SER clusters in another 3 oocytes. In 9 oocytes only one type of dysmorphism  
201 was present, while in 13 oocytes two or three different defects coincided (Supplementary table).

202

### 203 **Refractile bodies**



204 Refractile bodies were visible in the light microscope as prominent various-sized and typically  
205 dark specks disrupting cytoplasm homogeneity. Small refractile bodies (2–5  $\mu\text{m}$ ) occurred either  
206 isolated or alongside other irregularities, and were typically localized in the central part of the  
207 cytoplasm (Figure 1A). Interestingly, 3 examined eggs featured extremely large refractile bodies  
208 which exceeded 10  $\mu\text{m}$  in diameter and appeared lighter under stereomicroscope (Figure 1 D).  
209 When viewed under the electron microscope, the affected oocytes exhibited pleomorphic bodies  
210 depositing electron-dense granular material, amorphous substances, vesicles, lipid droplets, and  
211 membrane remnants (Figure 1 B, C, E, F-N). These clumps of heterogeneous cellular debris were  
212 typically delimited by a discontinuous membrane and surrounded by cytoplasm populated by  
213 oocyte mitochondria with atypical arch-like or transversal cristae, tubular and vesicular type of  
214 SER, and small vesicles (Figure 1 B, C, E-N), as previously described in human oocytes deemed  
215 morphologically normal by established clinical criteria (23). Notably, even the presence of  
216 oversized refractile bodies did not alter the homogeneous distribution of organelles characteristic  
217 for MII oocytes and maturation-induced formation of “necklace” complexes composed of multiple  
218 mitochondria attached to individual SER sacs (23) (Figure 1 B, C, L, N).

219

### 220 **Cytoplasmic granularity**

221 Centrally-located cytoplasmic granularity (CLCG) was identified during the routine  
222 stereomicroscopic examination as a large (> 30  $\mu\text{m}$  in diameter) crater-like region residing in the  
223 cell’s center (Figure 2 A). Ultrastructural analysis of 6 CLCG-exhibiting eggs showed that the  
224 uneven texture of their cytoplasm was caused by anomalous organelle distribution. The large  
225 granular area in the cell center featured an accumulation of enlarged SER sacs attended by  
226 closely associated mitochondria, vesicles, and lysosomes. In contrast, peripheral cytoplasm was  
227 harbored only individual mitochondria and tiny SER vesicles (Figure 2 B, C). Most SER cisternae  
228 within the central organelle conglomerate were markedly dilated compared to peripheral ones,  
229 and some reached the size of small vacuoles. The SER’s membrane appeared undulated and

230 confined clear fluid, occasionally containing small granules with an electron-dense substrate.  
231 Numerous small refractile bodies appeared trapped in dense organelle assemblages (Figure 2 B,  
232 C).

233

### 234 **SER disc and large SER aggregates**

235 The rare cytoplasmic abnormality, known as SER disc, was recognized in 1 egg in our sample  
236 cohort. This cytoplasmic aberration appeared in phase contrast as a flat, smooth plaque with an  
237 indistinct outline and diameter exceeding 30  $\mu\text{m}$  (Figure 3 A). Ultrastructural analysis showed that  
238 the vacuole-like structure was a giant assemblage of elongated tubular-type SER. The fine  
239 meshwork of curvilinear tubules was free of other organelles. Due to absence of the membrane,  
240 the SER mass periphery was in direct contact with the surrounding cytoplasm (Figure 3 B, C,  
241 Supplementary Figure 1B). Adjacent to the SER disc was a small vacuole containing electron-  
242 dense granules and lipid droplets (Figure 3B). Surrounding cytoplasm was found to be occupied  
243 by mitochondria-SER complexes indicating egg's maturity (Figure 3B, Supplementary Figure 1).  
244 Along with a massive SER disc and small "necklace" complexes, we also observed mid-sized (~5-  
245 7  $\mu\text{m}$ ) clusters of densely arrayed tubular SER decorated by only a few mitochondria  
246 (Supplementary Figure 1). Small refractile bodies were scattered in the cytoplasm  
247 (Supplementary Figure 1C). The meiotic spindle poles appeared to be loosened and  
248 chromosomes misaligned, indicating that the developmental potential of this particular oocyte was  
249 impaired (Supplementary Figure 1C). Interestingly, mid-sized SER clusters, undiscernible under  
250 low magnification, were found in another 3 oocytes analyzed for different dysmorphisms (Figure  
251 4 B, Supplementary Figure 2, Supplementary Figure 3).

252

### 253 **Vacuoles**

254 The severe vacuolization led to the ICSI rejection of 11 MII oocytes. The vacuoles differed in  
255 size, number, and appearance (Figure 4). In contrast to SER disc, all vacuoles were clearly visible

256 in transmitted light and had well-defined boundaries (Figure 4 A, D, G). Inspection of oocyte  
257 morphology under high magnification confirmed that these round reflective cavities were enclosed  
258 by a membrane and filled with fluid with a translucent or slightly floccular appearance (Figure 4  
259 B, E, H). A few TEM images captured adjacent vacuoles with their membranes in intimate contact,  
260 suggesting that these dynamic organelles might be prone to merging (Figure 4 C, E, F, H, I). One  
261 oocyte's vacuole was asymmetrically lined with fat droplets, and fine granules were present in its  
262 interior (Figure 4 G, H, I). Moreover, the oocyte featuring two enormous vacuoles harbored  
263 horseshoe- or ring-shaped mitochondria dispersed in the ooplasm, numerous little vacuoles, and  
264 sizable patches of amassed tubular SER surrounded by multiple mitochondria (Figure 4 B,  
265 Supplementary Figure 3 A, B). While SER disc and mid-sized aggregates detected in other oocyte  
266 samples were exclusively composed of tubular SER elements, here, the dense SER assemblage  
267 encompassed electron-dense granules, mitochondria, and small vacuoles (Figure 4 B,  
268 Supplementary Figure 3 A). Instead of an MII spindle with individualized chromosomes, we  
269 located condensed genetic material, which collapsed into an amorphous lump (Supplementary  
270 Figure 3 C). Together, observed morphological features denoted that the affected oocyte was  
271 pathological.

272

### 273 **Perturbation of cytoskeleton**

274 To test the hypothesis that some cytoplasmic irregularities may arise from cytoskeleton  
275 dysfunction, we targeted actin and microtubule function in oocytes maturing in vitro. A total of 88  
276 GV oocytes from 56 hormonally stimulated women enrolled in the clinical egg donation program  
277 (Supplementary table) were incubated overnight with small-molecule cytoskeletal inhibitors and  
278 examined by light, immunofluorescence, and electron microscopy (Figure 5 A). Specifically, were  
279 evaluated the maturation efficiency, global distribution of organelles, the integrity of the oolemma,  
280 and the chromosome-spindle configuration. The observed phenotypes were compared with  
281 control samples cultured simultaneously in maturation medium supplemented with DMSO (45

282 oocytes from 32 donors). Besides, our archive of TEM micrographs of morphologically normal in  
283 vitro-matured oocytes (23) was used as a reference.

284 An inhibitor of actin polymerization, cytochalasin D (CytD), was applied to disrupt actin  
285 network organization. Unlike control cells, which showed normal maturation rate, overall  
286 morphology, chromosome configuration, and ultrastructural pattern characteristic for human eggs  
287 (Supplementary Figure 4, Figure 5 B-D), all 14 oocytes matured in the presence of CytD failed to  
288 extrude PB after overnight culture and were grossly dysmorphic (Supplementary Figure 4 A,  
289 Figure 5 E). Fluorescence microscopy confirmed that both the cell cortex and non-cortical network  
290 of actin filament were impaired and non-homogenous distribution of organelles explained irregular  
291 cytoplasmic texture. The meiotic spindle was aberrant and misplaced (Supplementary Figure 4  
292 B). When viewed in electron microscopy, CytD-treated cells featured massive mosaic clusters of  
293 mitochondria, SER cisternae, and small vesicles. In addition, TEM revealed the presence of  
294 massive aggregates of loosely arrayed tubular SER (Figure 5 F, G). The plasma membrane of  
295 CytD-treated oocytes appeared ruffled and devoid of microvilli. Sectioning through the cortical  
296 area showed that cortical granules grouped beneath the oolemma but were sparse in comparison  
297 to controls (Figure 5 F).

298 In mouse oocytes, Brefeldin A (BFA) was found to inhibit actin network dynamics without  
299 affecting its structural integrity (27). Thus, we decided to expose immature human oocytes to this  
300 modulator of actin dynamics to determine whether structural or functional properties of the actin  
301 network are required for homogenous organelle distribution. In contrast to CytD-treated oocytes,  
302 oocytes cultured in presence of BFA retained the moderate capacity to complete maturation (6  
303 out of 18 oocytes) and showed no prominent morphological anomalies (Supplementary Figure 4  
304 A, Figure 5 H). The meiotic spindle was located at the cortex but was apolar and carried  
305 misaligned chromosomes (Supplementary Figure 4 B). Although the organelle distribution  
306 appeared normal in fluorescent images, the ultrastructural analysis revealed that SER cisternae  
307 within “necklace” SER-mitochondria complexes were markedly swollen (Figure 5 I, J). Dilatation

308 of SER was particularly prominent in prophase-arrested GV oocytes, and phenotype receded as  
309 maturation progressed (Supplementary Figure 5). Unlike in the CytD group, the plasma  
310 membrane of BFA-treated oocytes showed no obvious pathology and was covered with microvilli  
311 (Figure 5 I). Compared to control conditions, an increased number of tiny refractile bodies was  
312 observed in the cytoplasm. A striking difference between the CytD and BFA phenotypes suggests  
313 that structural integrity of actin filaments rather than vesicle-driven network dynamics is required  
314 for homogenous organelle distribution during cytoplasmic maturation.

315 Next, we sought to determine the role of microtubules in the rearrangement of ooplasm  
316 occurring during human oocyte maturation (23). Two anti-mitotic drugs were used to evaluate if  
317 the inhibition of microtubules can induce excessive organelle clustering. As expected, the  
318 microtubule-stabilizing drug paclitaxel (PX) application prevented chromosome segregation in 9  
319 out of 11 meiotically competent oocytes (Supplementary Figure 4 A). In fluorescently stained  
320 samples, the spindle apparatus was disorganized and detached from the plasma membrane  
321 (Supplementary Figure 4 B). Nevertheless, the overall oocyte's shape and cytoplasmic texture  
322 appeared normal (Figure 5 K). Neither fluorescent nor electron microscopy uncovered deviation  
323 from a normal distribution of organelles (Supplementary Figure 4 B, Figure 5 L). Fine morphology  
324 of the oolemma and adjacent cortical area showed no irregularities. Tiny refractile bodies, non-  
325 discernible under the stereomicroscope, were observed in TEM images of all PX-treated oocytes  
326 (Figure 5 M).

327 To our surprise, the application of nocodazole (NC), known as a potent inhibitor of  
328 microtubule polymerization, did not prevent meiotic spindle assembly and PB extrusion in our  
329 experiments. Out of 22 GV oocytes exposed to NC during overnight culture, 21 cells assembled  
330 bipolar spindle, and 15 completed their maturation by midday the next day (Supplementary Figure  
331 4A, Supplementary Figure 6 A). Thus, we decided to probe the anti-tubulin effect by short-term  
332 treatment of 5 MII oocytes exhibiting a birefringent spindle. However, the immunofluorescence  
333 imaging showed that the meiotic spindle remained insensitive to 1-hour NC exposure

334 (Supplementary Figure 6 B). The rapid spindle disturbance was observed when the calcium  
335 channel blocker, verapamil, was added to the maturation medium (Supplementary Figure 6 A, B).  
336 During overnight culture, 10 out of 11 GV oocytes resumed meiosis, but only 1 oocyte extruded  
337 a PB. These experiments demonstrated that combined drug treatment did not impede meiotic  
338 resumption but efficiently prevented chromosome segregation (Supplementary Figure 4 A). All  
339 oocytes incubated in the presence of NC and verapamil showed normal appearance in phase  
340 contrast, and no alteration in organelle distribution and morphology was found at the  
341 ultrastructural level. Also, membrane and cortical region architecture did not differ from the control  
342 cells (Figure 5 N-P).

343

## 344 **DISCUSSION**

345 Electron microscopy proved to be a powerful tool enabling investigation of the fine  
346 morphology of human oocytes, which are available for research only in small numbers. Detailed  
347 inspection of subcellular organization provides information about the nature of morphological  
348 aberrations indicated by routine oocyte examination. Moreover, high-magnification scrutiny can  
349 reveal features that are undiscernible at the light-microscopy level. In this study, we performed  
350 TEM analysis of IVF oocytes with distinct cytoplasmic abnormalities and evaluated the degree of  
351 their deviation from normal oocytes' ultrastructural pattern (Figure 6). Furthermore, we  
352 demonstrated that disruption of the actin network in maturing oocytes leads to a similar  
353 misarrangement of subcellular structures as seen in dysmorphic eggs.

354 The morphological irregularities are common in human oocytes retrieved from hormonally  
355 stimulated ovaries. Here, the supraphysiological concentration of gonadotropins enhances the  
356 recruitment of subordinate follicles and rescues them from atresia. According to a study involving  
357 516 ICSI cycles, over 90% of patients had at least one abnormal oocyte (10), and the overall  
358 incidence of oocyte dysmorphisms across studies is reported as high as 60-80% (12-14, 16, 28).  
359 Some anomalies may be attributed to intrinsic factors such as genetic background and patient's

360 age, while others seem to be related to the suboptimal intrafollicular environment (e.g., oxidative  
361 stress, hypoxia, proapoptotic factors, inflammation, and hyperglycemia). Recently breast cancer  
362 was identified as a risk factor for the presence of dysmorphic oocytes (29). This evidence  
363 suggests that alteration of hormonal receptors and/or signaling pathways might impair follicle-  
364 oocyte dialogue and compromise the quality of developing female gametes. Previous  
365 ultrastructural studies analyzed only dysmorphic oocytes derived from infertile patients (6, 11, 19,  
366 20, 30). We also document the most common cytoplasmic abnormalities in oocytes from young  
367 women with no reproductive issues. In IVF patients, cellular perturbations often affect all oocytes  
368 collected and show a high rate of recidivism (31, 32). In egg donation program, severe aberrations  
369 are seen only as a minority of the cohort, illustrating a quality hierarchy of hormone-responsive  
370 follicles. Intra-ovarian regulation ensures mono-ovulation of the best available egg in our species.  
371 But administration of exogenous hormones overrides this quality control mechanism unmasking  
372 phenotypic variability of inferior female gametes that are destined to apoptosis under physiological  
373 conditions. All dysmorphic oocyte samples in this study were fixed shortly after denudation.  
374 Therefore, adverse effects of in vitro ageing can be excluded.

375 Refractile bodies were the most frequently observed type of cytoplasmic abnormalities in our  
376 samples. The detailed analysis showed that these inclusions are heterogeneous clumps of  
377 degraded cellular material, which is in line with published TEM reports (19, 30). Our experience  
378 that tiny electron-dense refractile bodies can be detected even in human oocytes with normal  
379 appearance (23) implies that this irregularity represents phenotypical variation rather than  
380 detrimental cytopathology. The ultrastructure of refractile bodies resembles tertiary lysosomes  
381 storing cellular waste. These catabolic organelles are abundant in post-mitotic cells in which the  
382 lysosomal degradation pathway ensures homeostasis and lifespan control (33). Similarly,  
383 membrane-bound refractile bodies may deposit undegradable substances such as products of  
384 proteolytic activity, lipid peroxidation, phagocytosis, and autophagy to avoid the buildup of  
385 unwanted and damaged cellular material in the cytoplasm of long-lived human oocytes. This

386 notion is supported by the evidence that large refractile bodies are loaded with oxidized  
387 lipochrome lipofuscin (30). This insoluble pigment accumulates over time in neurons, cardiac and  
388 skeletal muscle, retinal pigment epithelium and hepatic cells, and is considered as the hallmark  
389 of aging (34). The hypothesis that refractile bodies incorporate biological “garbage” and/or  
390 sequester xenobiotics accumulated in terminally differentiated cells throughout a woman’s life is  
391 endorsed by clinical experience that the incidence of dark inclusions is age-dependent  
392 (unpublished data). Whether the abnormal protein or lipid metabolism, reduced capacity of  
393 intralysosomal degradation, oxidative stress, or intracellular deposition of insoluble toxic materials  
394 are involved in the generation of refractile bodies remains to be explored.

395 SER disc is regarded as the most severe cytoplasmic abnormality of human oocytes. Clinical  
396 data indicate that embryos derived from affected oocytes have a higher risk of suboptimal IVF  
397 outcomes, including a reduced chance of pregnancy, obstetric complications, and congenital  
398 malformations (11, 20, 31, 35). Therefore, professional authorities strongly recommended that  
399 oocytes displaying a SER disc should not be used for ICSI (4). Nevertheless, there are reports  
400 that SER disc-positive oocytes can develop normally and give rise to healthy newborns (36, 37).  
401 The SER disc could be mistaken for a vacuole during the routine morphological assessment. But  
402 at the ultrastructural level, a massive assemblage of SER is easily distinguishable from the  
403 membrane-bound fluid-filled vacuoles, as demonstrated by us and others (19, 20). This study  
404 involved one oocyte exhibiting a single pronuclear-sized SER disc. Unlike in earlier studies, here,  
405 the SER disc periphery was not lined with mitochondria which could explain the structure’s poor  
406 visibility during routine oocyte inspection. Notably, the ultrastructural analysis showed that  
407 sizeable SER aggregates also resided in 3 more oocyte samples which were scrutinized due to  
408 different types of dysmorphism (Supplementary Table). We have previously monitored structural  
409 changes during cytoplasmic maturation and observed the progressive association of mitochondria  
410 with SER and the formation of heterotypic SER-mitochondria complexes in oocytes with normal  
411 appearance. In addition to characteristic “necklace” complexes, composed of a SER sac



412 surrounded by a corona of mitochondria, small aggregates of tubular SER ( $\leq 3 \mu\text{m}$ ) decorated by  
413 a few mitochondria were detected in the cortex of normal MII oocytes (23, 38). The presence of  
414 similar SER-mitochondria clusters is documented by historical TEM studies (39-42). In light of  
415 these findings, it is tempting to speculate that the SER disc represents an extreme phenotype  
416 arising as the exaggeration of the physiological process taking place during oocyte maturation.  
417 The intimate bicomponent alliance of energy-supplying organelles and calcium-storing elements  
418 ensures effective calcium signaling required for oocyte activation (38, 43, 44). However,  
419 excessive SER aggregation reducing surface contact with mitochondria may diminish calcium  
420 availability during fertilization and thus compromise oocyte's developmental competence.

421 Based on our ultrastructural data, refractile bodies and subtle SER aggregation could also  
422 occur in normal oocytes, whereas vacuolization appears to be an exclusively deviant feature. The  
423 variable number, size, and appearance of vacuoles support the hypothesis that these inclusions  
424 are products of rapid endocytic process and their content corresponds to perivitelline fluid (19). It  
425 is intuitive to presume that the larger portion of cytoplasm vacuoles occupy, the more severe the  
426 impact on oocyte's fitness. In our settings, the large fluid-filled vacuoles posed a challenge for  
427 intracellular structure preservation, and some samples did not endure the fixation procedure.  
428 Similarly, the vacuolization may sensitize the oocyte to osmotic changes and hamper its  
429 cryosurvival. The simultaneous presence of giant vacuoles with large SER aggregates, and  
430 misshaped, most probably dysfunctional (45), mitochondria indicate that vacuolization can be a  
431 readily noticeable sign of major cellular disturbance. Horseshoe- and ring-shaped mitochondria  
432 have been previously detected in TEM micrographs of a SER-positive human oocyte and linked  
433 to oocyte deterioration (11).

434 Presented image data illustrated that the structural basis of CLCG and SER disc is  
435 anomalous aggregation of SER elements. This similarity, together with our clinical experience  
436 that both cytoplasmic texture irregularities typically occur in mature eggs and disappear upon  
437 sperm entry, suggests that the two phenotypes might have a common foundation. Biological

438 nature, limited availability, and individual variability make functional experiments with human  
439 oocytes notoriously challenging. Here, we employed chemical inhibitors to address the role of the  
440 cytoskeleton in organelle arrangement in a representative number of human oocytes derived from  
441 young and healthy donors. Although selected drugs are commonly used in cytoskeleton research,  
442 their off-target effects can not be ruled out. Therefore, further experimental investigation is needed  
443 to validate our results. Nevertheless, the observed phenotype reproducibility in each treatment  
444 group and the number of controls support the relevance of data we obtained. Our finding that  
445 actin, not microtubules, plays a role in the homogenous distribution of organelles during human  
446 oocyte maturation contrasts with published evidence that microfilament depolymerization did not  
447 affect the motility of mitochondria in mouse and porcine oocytes (46, 47). On the other hand, the  
448 impact of both actin-targeting drugs on spindle-chromosome configuration is in line with the  
449 recognized role of spindle actin in human oocyte's meiotic spindle assembly and chromosome  
450 alignment (48). The SER cisternae swelling observed in BFA-treated oocytes evidenced that the  
451 drug blocked vesicular trafficking from endoplasmic reticulum (ER) to the Golgi apparatus leading  
452 to the membrane recycling to ER. This phenomenon was particularly pronounced in GV oocytes  
453 and less apparent in maturing oocytes because the Golgi apparatus disassembles upon  
454 resumption of meiosis (23). Surprisingly, in our experiments, human oocytes exhibited  
455 insensitivity to mitotic poison nocodazole in a concentration capable of inhibiting spindle assembly  
456 in mouse oocytes (49). This observation suggests that human oocytes may be equipped with a  
457 mechanism for the efflux of specific foreign substances. The ability of human oocytes to actively  
458 eliminate xenobiotics was previously reported by Brayboy and colleagues (50), who speculated  
459 that protection against toxic substances might play a pivotal role in the survival of long-lived  
460 human oocytes exposed to environmental pollutants. Exploring oocyte chemoresistance might  
461 open new opportunities for developing therapeutical strategies to preserve the fertility of cancer  
462 patients.

463           Cytoplasmic abnormalities may indicate female gametes' genetic, epigenetic, and  
464 metabolic defects. Large oocyte cytoplasm not only constitutes an intracellular signaling hub  
465 integrating external and internal cues, but also provides organelles, nutrients, and metabolites  
466 needed to support post-fertilization development. Alteration of cellular architecture might impact  
467 oocyte's homeostasis, capacity to interact with sperm-delivered molecular factors, and sustain  
468 metabolism of early cleavage embryos. In transcriptionally-silent oocytes, the cytoplasm stores  
469 maternal mRNAs and ensures spatial and temporal control over the translation and degradation  
470 of transcripts synthesized during oogenesis (51). A recent study showed that mammalian oocytes,  
471 including humans, dock their maternal mRNA in mitochondria-associated membrane-less  
472 domains (52). Anomalous organelle distribution seen in aberrant oocytes is likely to compromise  
473 the availability of mRNA and, thus, the efficiency of protein synthesis and post-translation  
474 modifications. Since the cell mass of a newly formed zygote is almost exclusively  
475 maternally-inherited, a deficiency in ooplasmic properties would inevitably compromise the  
476 oocyte's capacity to produce a viable embryo.

477           Objective oocyte rating would be especially useful in shared egg donor programs and medical  
478 freezing cycles. However, micrographs of abnormal morphotypes presented here, together with  
479 our earlier data from morphologically normal oocytes (23), indicate that routine stereoscopic  
480 examination is insufficient to assess egg quality. High magnification is needed to detect  
481 pathological features such as misshaped mitochondria and enlarged SER. The development of  
482 high-resolution tomographic methods now enables volumetric imaging of oocyte and ovarian  
483 tissue architecture (24, 53). Three-dimensional reconstruction of isolated and/or cumulus-  
484 enclosed dysmorphic oocytes would elucidate the spatial relationship of subcellular structures  
485 and advance our understanding of how the oocytes interact with surrounding cells. The  
486 unexplored character of the female gamete and its typical sphericity makes the commercial claims  
487 that oocyte ability to produce transferable embryos can be deduced from a single low-resolution  
488 snapshot questionable. The emergence of non-invasive label-free imaging techniques (54, 55)

489 and omics approaches suitable to analyze individual oocyte's microenvironment (56, 57) holds  
490 the potential to identify new biomarkers of egg quality for the benefit of IVF patients.

491 In conclusion, this study enhances our understanding of the human oocyte's internal  
492 organization and possible factors implicated in the evolution of certain morphological  
493 abnormalities. Presented micrographs collection extends rare documentation of the fine  
494 morphology and phenotypical variability of dysmorphic eggs. Furthermore, our inhibition  
495 experiments demonstrated that actin disruption leads to excessive organelle clustering and  
496 generates an ultrastructural pattern resembling naturally occurring aberrant phenotypes.  
497 Together, these data support the hypothesis that actin cytoskeleton dysfunction (along with other  
498 unknown factors) underlies oocyte dysmorphism encountered in the clinics. We hope that this  
499 study's data, along with those provided by other investigators, will contribute to forming the  
500 scientific groundwork for improved evaluation of egg morphology in ART.

501

#### 502 **CONFLICT OF INTERESTS:**

503 All authors declare no conflict of interest.

504

#### 505 **ACKNOWLEDGMENTS**

506 The authors wish to thank egg donors and clinical staff for providing research samples and  
507 administrating relevant documentation. We also acknowledge the core microscopic facility for  
508 technical support with the acquisition of fluorescent microscopy images presented in this paper.

509

#### 510 **AUTHOR CONTRIBUTIONS:**

511 M.T.: Electron microscopy of dysmorphic oocytes, Inhibition experiments, Fluorescence  
512 microscopy, Data analysis and interpretation, Manuscript and figure drafting; Z.T.: Sample  
513 processing, Electron microscopy of dysmorphic oocytes, Data analysis and interpretation; D.K.:  
514 Sample collection, Morphological assessment, Polarized Light Microscopy; P.O.: Hormonal

515 stimulation, Recruitment of sample donors, Manuscript critical reading; S.K.: Informed consent  
516 collection and administration, Manuscript critical reading; Z.H.: Project design, Data analysis, and  
517 interpretation, Manuscript writing. All authors discussed the results and commented on the final  
518 manuscript.

519

## 520 **REFERENCES:**

- 521 1. Yamada M, Isaji Y. Structural and functional changes linked to, and factors promoting,  
522 cytoplasmic maturation in mammalian oocytes. *Reprod Med Biol.* 2011;10(2):69-79.
- 523 2. Mao L, Lou H, Lou Y, Wang N, Jin F. Behaviour of cytoplasmic organelles and  
524 cytoskeleton during oocyte maturation. *Reprod Biomed Online.* 2014;28(3):284-99.
- 525 3. Satouh Y, Sato K. Reorganization, specialization, and degradation of oocyte maternal  
526 components for early development. *Reprod Med Biol.* 2023;22(1):e12505.
- 527 4. Embryology ASiRMaESiGo. The Istanbul consensus workshop on embryo assessment:  
528 proceedings of an expert meeting. *Hum Reprod.* 2011;26(6):1270-83.
- 529 5. Rienzi L, Balaban B, Ebner T, Mandelbaum J. The oocyte. *Hum Reprod.* 2012;27 Suppl  
530 1:i2-21.
- 531 6. Sousa M, Cunha M, Silva J, Oliveira E, Pinho MJ, Almeida C, et al. Ultrastructural and  
532 cytogenetic analyses of mature human oocyte dysmorphisms with respect to clinical outcomes. *J*  
533 *Assist Reprod Genet.* 2016;33(8):1041-57.
- 534 7. Junko O. Intracytoplasmic Morphological Abnormalities in Human Oocytes. 26(1) ed.  
535 *Journal of Mammalian Ova Research*2009. p. 26-31.
- 536 8. Xia P. Intracytoplasmic sperm injection: correlation of oocyte grade based on polar body,  
537 perivitelline space and cytoplasmic inclusions with fertilization rate and embryo quality. *Hum*  
538 *Reprod.* 1997;12(8):1750-5.

- 539 9. Ebner T, Moser M, Tews G. Is oocyte morphology prognostic of embryo developmental  
540 potential after ICSI? *Reprod Biomed Online*. 2006;12(4):507-12.
- 541 10. Rienzi L, Ubaldi FM, Iacobelli M, Minasi MG, Romano S, Ferrero S, et al. Significance of  
542 metaphase II human oocyte morphology on ICSI outcome. *Fertil Steril*. 2008;90(5):1692-700.
- 543 11. Sá R, Cunha M, Silva J, Luís A, Oliveira C, Teixeira da Silva J, et al. Ultrastructure of  
544 tubular smooth endoplasmic reticulum aggregates in human metaphase II oocytes and clinical  
545 implications. *Fertil Steril*. 2011;96(1):143-9.e7.
- 546 12. Braga DP, Setti AS, Figueira ReC, Machado RB, Iaconelli A, Borges E. Influence of oocyte  
547 dysmorphisms on blastocyst formation and quality. *Fertil Steril*. 2013;100(3):748-54.
- 548 13. De Sutter P, Dozortsev D, Qian C, Dhont M. Oocyte morphology does not correlate with  
549 fertilization rate and embryo quality after intracytoplasmic sperm injection. *Hum Reprod*.  
550 1996;11(3):595-7.
- 551 14. Balaban B, Urman B, Sertac A, Alatas C, Aksoy S, Mercan R. Oocyte morphology does  
552 not affect fertilization rate, embryo quality and implantation rate after intracytoplasmic sperm  
553 injection. *Hum Reprod*. 1998;13(12):3431-3.
- 554 15. Kahraman S, Yakin K, Dönmez E, Samli H, Bahçe M, Cengiz G, et al. Relationship  
555 between granular cytoplasm of oocytes and pregnancy outcome following intracytoplasmic sperm  
556 injection. *Hum Reprod*. 2000;15(11):2390-3.
- 557 16. Ashrafi M, Karimian L, Eftekhari-Yazdi P, Hasani F, Arabipoor A, Bahmanabadi A, et al.  
558 Effect of oocyte dysmorphisms on intracytoplasmic sperm injection cycle outcomes in normal  
559 ovarian responders. *J Obstet Gynaecol Res*. 2015;41(12):1912-20.
- 560 17. Nikiforov D, Grøndahl ML, Hreinsson J, Andersen CY. Human Oocyte Morphology and  
561 Outcomes of Infertility Treatment: a Systematic Review. *Reprod Sci*. 2022;29(10):2768-85.
- 562 18. Setti AS, Figueira RC, Braga DP, Colturato SS, Iaconelli A, Borges E. Relationship  
563 between oocyte abnormal morphology and intracytoplasmic sperm injection outcomes: a meta-  
564 analysis. *Eur J Obstet Gynecol Reprod Biol*. 2011;159(2):364-70.

- 565 19. Van Blerkom J. Occurrence and developmental consequences of aberrant cellular  
566 organization in meiotically mature human oocytes after exogenous ovarian hyperstimulation. *J*  
567 *Electron Microscop Tech.* 1990;16(4):324-46.
- 568 20. Otsuki J, Okada A, Morimoto K, Nagai Y, Kubo H. The relationship between pregnancy  
569 outcome and smooth endoplasmic reticulum clusters in MII human oocytes. *Hum Reprod.*  
570 2004;19(7):1591-7.
- 571 21. Otsuki J, Nagai Y. A phase of chromosome aggregation during meiosis in human oocytes.  
572 *Reprod Biomed Online.* 2007;15(2):191-7.
- 573 22. Azizi E, Naji M, Nazari L, Salehpour S, Karimi M, Borumandnia N, et al. Serum anti-  
574 Müllerian hormone is associated with oocyte dysmorphisms and ICSI outcomes. *Int J Gynaecol*  
575 *Obstet.* 2019;147(2):179-86.
- 576 23. Trebichalská Z, Kyjovská D, Kloudová S, Otevřel P, Hampl A, Holubcová Z. Cytoplasmic  
577 maturation in human oocytes: a ultrastructural study †. *Biol Reprod.* 2021;104(1):106-16.
- 578 24. Trebichalská Z, Javůrek J, Tatíčková M, Kyjovská D, Kloudová S, Otevřel P, et al. High-  
579 Resolution 3D Reconstruction of Human Oocytes Using Focused Ion Beam Scanning Electron  
580 Microscopy. *Front Cell Dev Biol.* 2021;9:755740.
- 581 25. Holubcová Z, Kyjovská D, Martonová M, Páralová D, Klenková T, Kloudová S. Human  
582 Egg Maturity Assessment and Its Clinical Application. *J Vis Exp.* 2019(150).
- 583 26. Holubcová Z, Blayney M, Elder K, Schuh M. Human oocytes. Error-prone chromosome-  
584 mediated spindle assembly favors chromosome segregation defects in human oocytes. *Science.*  
585 2015;348(6239):1143-7.
- 586 27. Holubcová Z, Howard G, Schuh M. Vesicles modulate an actin network for asymmetric  
587 spindle positioning. *Nat Cell Biol.* 2013;15(8):937-47.
- 588 28. de Cássia S Figueira R, de Almeida Ferreira Braga DP, Semião-Francisco L, Madaschi  
589 C, Iaconelli A, Borges E. Metaphase II human oocyte morphology: contributing factors and effects

- 590 on fertilization potential and embryo developmental ability in ICSI cycles. *Fertil Steril.*  
591 2010;94(3):1115-7.
- 592 29. Fabiani C, Guarino A, Meneghini C, Licata E, Paciotti G, Miriello D, et al. Oocyte Quality  
593 Assessment in Breast Cancer: Implications for Fertility Preservation. *Cancers (Basel).*  
594 2022;14(22).
- 595 30. Otsuki J, Nagai Y, Chiba K. Lipofuscin bodies in human oocytes as an indicator of oocyte  
596 quality. *J Assist Reprod Genet.* 2007;24(7):263-70.
- 597 31. Akarsu C, Çağlar G, Vicdan K, Sözen E, Biberoğlu K. Smooth endoplasmic reticulum  
598 aggregations in all retrieved oocytes causing recurrent multiple anomalies: case report. *Fertil*  
599 *Steril.* 2009;92(4):1496.e1-.e3.
- 600 32. Fancsovits P, Murber A, Gilán ZT, Rigó J, Urbancsek J. Human oocytes containing large  
601 cytoplasmic vacuoles can result in pregnancy and viable offspring. *Reprod Biomed Online.*  
602 2011;23(4):513-6.
- 603 33. Terman A, Gustafsson B, Brunk UT. Mitochondrial damage and intralysosomal  
604 degradation in cellular aging. *Mol Aspects Med.* 2006;27(5-6):471-82.
- 605 34. Terman A, Brunk UT. Lipofuscin. *Int J Biochem Cell Biol.* 2004;36(8):1400-4.
- 606 35. Ebner T, Moser M, Shebl O, Sommerguber M, Tews G. Prognosis of oocytes showing  
607 aggregation of smooth endoplasmic reticulum. *Reprod Biomed Online.* 2008;16(1):113-8.
- 608 36. Mateizel I, Van Landuyt L, Tournaye H, Verheyen G. Deliveries of normal healthy babies  
609 from embryos originating from oocytes showing the presence of smooth endoplasmic reticulum  
610 aggregates. *Hum Reprod.* 2013;28(8):2111-7.
- 611 37. Hattori H, Nakamura Y, Nakajo Y, Araki Y, Kyono K. Deliveries of babies with normal  
612 health derived from oocytes with smooth endoplasmic reticulum clusters. *J Assist Reprod Genet.*  
613 2014;31(11):1461-7.



- 614 38. Sousa M, Barros A, Silva J, Tesarik J. Developmental changes in calcium content of  
615 ultrastructurally distinct subcellular compartments of preimplantation human embryos. *Mol Hum*  
616 *Reprod.* 1997;3(2):83-90.
- 617 39. Zamboni L, Thompson RS, Smith DM. Fine morphology of human oocyte maturation in  
618 vitro. *Biol Reprod.* 1972;7(3):425-57.
- 619 40. Sathananthan, Henry, Arunachalam. Maturation of the human oocyte in vitro: Nuclear  
620 events during meiosis (an ultrastructural study). *Gamete Research* 1985;12:237-54.
- 621 41. Lopata A, Sathananthan AH, McBain JC, Johnston WI, Speirs AL. The ultrastructure of  
622 the preovulatory human egg fertilized in vitro. *Fertil Steril.* 1980;33(1):12-20.
- 623 42. Szöllösi D, Mandelbaum J, Plachot M, Salat-Baroux J, Cohen J. Ultrastructure of the  
624 human preovulatory oocyte. *J In Vitro Fert Embryo Transf.* 1986;3(4):232-42.
- 625 43. Miao YL, Williams CJ. Calcium signaling in mammalian egg activation and embryo  
626 development: the influence of subcellular localization. *Mol Reprod Dev.* 2012;79(11):742-56.
- 627 44. Wakai T, Zhang N, Vangheluwe P, Fissore RA. Regulation of endoplasmic reticulum  
628 Ca(2+) oscillations in mammalian eggs. *J Cell Sci.* 2013;126(Pt 24):5714-24.
- 629 45. Miyazono Y, Hirashima S, Ishihara N, Kusukawa J, Nakamura KI, Ohta K. Uncoupled  
630 mitochondria quickly shorten along their long axis to form indented spheroids, instead of rings, in  
631 a fission-independent manner. *Sci Rep.* 2018;8(1):350.
- 632 46. Calarco PG. The role of microfilaments in early meiotic maturation of mouse oocytes.  
633 *Microsc Microanal.* 2005;11(2):146-53.
- 634 47. Sun QY, Wu GM, Lai L, Park KW, Cabot R, Cheong HT, et al. Translocation of active  
635 mitochondria during pig oocyte maturation, fertilization and early embryo development in vitro.  
636 *Reproduction.* 2001;122(1):155-63.
- 637 48. Roeles J, Tsiavaliaris G. Actin-microtubule interplay coordinates spindle assembly in  
638 human oocytes. *Nat Commun.* 2019;10(1):4651.

- 639 49. Xu Y, Xu CL, Xu ZF, Wang XJ, Liang HS, Zeng ZC, et al. Fbf1 regulates mouse oocyte  
640 meiosis by influencing Plk1. *Theriogenology*. 2021;164:74-83.
- 641 50. Brayboy LM, Oulhen N, Witmyer J, Robins J, Carson S, Wessel GM. Multidrug-resistant  
642 transport activity protects oocytes from chemotherapeutic agents and changes during oocyte  
643 maturation. *Fertil Steril*. 2013;100(5):1428-35.
- 644 51. Jansova D, Tetkova A, Koncicka M, Kubelka M, Susor A. Localization of RNA and  
645 translation in the mammalian oocyte and embryo. *PLoS One*. 2018;13(3):e0192544.
- 646 52. Cheng S, Altmeyden G, So C, Welp LM, Penir S, Ruhwedel T, et al. Mammalian oocytes  
647 store mRNAs in a mitochondria-associated membraneless compartment. *Science*.  
648 2022;378(6617):eabq4835.
- 649 53. Fiorentino G, Parrilli A, Garagna S, Zuccotti M. Three-Dimensional Micro-Computed  
650 Tomography of the Adult Mouse Ovary. *Front Cell Dev Biol*. 2020;8:566152.
- 651 54. Rubessa M, Wheeler MB. Label-free microscopy: A non-invasive new tool to assess  
652 gametes and embryo quality. *Theriogenology*. 2020;150:241-6.
- 653 55. Sciorio R, Miranian D, Smith GD. Non-invasive oocyte quality assessment. *Biol Reprod*.  
654 2022;106(2):274-90.
- 655 56. Seli E, Robert C, Sirard MA. OMICS in assisted reproduction: possibilities and pitfalls. *Mol*  
656 *Hum Reprod*. 2010;16(8):513-30.
- 657 57. Egea RR, Puchalt NG, Escrivá MM, Varghese AC. OMICS: Current and future  
658 perspectives in reproductive medicine and technology. *J Hum Reprod Sci*. 2014;7(2):73-92.

659

## 660 **FIGURE LEGENDS**

661

662 **Figure 1: Examples of refractile bodies observed in dysmorphic human eggs.** Live cell  
663 appearance in transmitted light before fixation (A, D) and TEM micrographs of the two  
664 representative MII oocytes showing different numerous small (A) or one big inclusion (D).  
665 Overviews (B, E) and details (C, dashed rectangle in B; F, dashed rectangle in E) of the

666 corresponding cells' ultrastructure. Refractile bodies are indicated by arrows (A-E); typical  
667 organelles are labelled: Mt-mitochondria, SER – smooth endoplasmic reticulum, V – vesicles;  
668 asterisks indicate Mt-SER („necklace“) complexes characteristic of mature human eggs (B, C).  
669 Overview of ultrastructural variability of refractile bodies found in multiple sample cells (G-N).  
670 Membrane-bound bodies exhibit variable content, which could include granular material (G, H, J-  
671 N), membrane remnants (G-I), and lipid droplets (J-N). Scale bar, 50  $\mu\text{m}$  (A, D), 10  $\mu\text{m}$  (B, E), 1  
672  $\mu\text{m}$  (C, F, G-N).

673

674 **Figure 2: Example of a human egg exhibiting prominent centrally-located cytoplasmic**  
675 **granularity (CLCG).** Live cell appearance in transmitted light before fixation (A, CLCG indicated  
676 by arrow) and TEM micrographs (B, C) of its ultrastructure. Overview of ooplasm with excessive  
677 organelle clustering in the cell center (B) and magnified detail of organelle cluster periphery  
678 (dashed area) presenting a refractile body surrounded by dilated SER cisternae, mitochondria,  
679 and small vesicles (C). Scale bar, 50  $\mu\text{m}$  (A), 10  $\mu\text{m}$  (B), 2  $\mu\text{m}$  (C).

680

681 **Figure 3: Human egg exhibiting SER disc.** Live cell appearance of affected MII oocyte in  
682 transmitted light before fixation (A, arrow indicates smooth rounded area corresponding to SER  
683 disc) and in TEM micrographs (B, C) of its ultrastructure. Overview of SER disc with adjacent  
684 granular vacuole and surrounding cytoplasm (B) and detail of SER disc interior. (C). Scale bar,  
685 50  $\mu\text{m}$  (A), 5  $\mu\text{m}$  (B), 2  $\mu\text{m}$  (C).

686

687 **Figure 4: Examples of oocytes exhibiting vacuoles.** First oocyte with two large vacuoles (A-  
688 C), second one with multiple small vacuoles (D-F), and third one a granular vacuole (G-I): live cell  
689 appearance in transmitted light before fixation (left column) and TEM micrographs – overview  
690 (middle column) and detail (right column) of the corresponding cells. Scale bar, 50  $\mu\text{m}$  (A, D, G),  
691 5  $\mu\text{m}$  (B, E, H), 2  $\mu\text{m}$  (C, F, I).

692

693 **Figure 5: Perturbation of cytoskeleton.** Schematic depiction of experimental set-up (A). GV  
694 oocytes retrieved in donor IVF cycles were cultured overnight in presence of cytoskeleton-  
695 affecting drugs or corresponding concentration of DMSO. Live cell appearance in transmitted light  
696 (left column) and TEM micrographs of the same cell showing overviews (middle column) and  
697 details (right column) of control (B-D) and drug treated-oocytes (E-P). Cytochalasin D (E-G) and  
698 brefeldin A (H-J) were used to inhibit the actin network. Paclitaxel (K-M) and nocodazole  
699 enhanced with verapamil (N-P) were used to inhibit microtubules. Granular cytoplasm and

700 excessive organelle clustering is visible in oocytes in which actin polymerization was blocked (E-  
701 G). Scale bar, 50  $\mu\text{m}$  (B, E, H, K, N), 10  $\mu\text{m}$  (C, F, I, L, O), 1  $\mu\text{m}$  (D, G, J, M, P).

702

703 **Figure 6: The schematic representation of the subcellular morphological organization of**  
704 **normal oocytes, dysmorphic oocytes, and oocytes with the perturbed cytoskeleton.**

705

706 **Supplementary Figure 1: Representative TEM micrographs of SER disc oocyte's**  
707 **cytoplasm.** Mid-sized SER aggregates (A-C; arrows) and refractile bodies (C; arrowheads) are  
708 present in the ooplasm. Detail of meiotic spindle (C). The same sample as in Figure 3. Scale bar,  
709 5  $\mu\text{m}$ .

710

711 **Supplementary Figure 2: Example of the oocyte with mid-sized SER clusters undetectable**  
712 **by light microscopy.** Live cell appearance in transmitted light (A) and TEM micrographs (B, C)  
713 of the oocyte exhibiting a prominent refractile body (arrow). Overview (B) and magnified detail (C;  
714 dashed rectangle in B) of enlarged SER clusters located in the cortical area are shown. Scale  
715 bar, 50  $\mu\text{m}$  (A), 10  $\mu\text{m}$  (B), 2  $\mu\text{m}$  (C).

716

717 **Supplementary Figure 3: TEM micrographs of a vacuolized oocyte presenting mid-sized**  
718 **SER aggregate.** Same sample as in Figure 4 A-C; asterisk indicates mid-sized SER aggregate  
719 (A), arrowheads indicate horseshoe- and ring-shaped mitochondria (A-C), and arrow indicates  
720 chromosome cluster (C). Numerous little vacuoles are visible in the cytoplasm (A-C). Scale bar,  
721 5  $\mu\text{m}$  (A), 2  $\mu\text{m}$  (B, C).

722

723 **Supplementary Figure 4: Maturation rate and morphology of drug-treated oocytes.** Graph  
724 depicting in vitro maturation efficiency of drug-treated and control oocytes; n = number of oocytes  
725 (A). Fluorescence images of oocytes cultured overnight in control or experimental conditions (B).  
726 Overall cell morphology (top row) and meiotic spindle detail (bottom row) of a MII oocyte matured  
727 in presence of DMSO, and MI-arrested oocytes exposed to actin (cytochalasin D, brefeldin A) and  
728 microtubule (paclitaxel) inhibiting drugs. Actin microfilaments (green), microtubules (magenta),  
729 mitochondria (gray), and chromosomes (blue) are labeled. Scale bar, 10  $\mu\text{m}$ .

730

731 **Supplementary Figure 5: Effect of Brefeldin A exposure on intracellular morphology of**  
732 **human oocytes maturing in vitro.** TEM micrographs of oocytes maturing in control conditions  
733 (A-C) and exposed to brefeldin A (D-F). The swelling of SER cisternae is prominent in brefeldin  
734 A-treated GV and MI (metaphase I) oocytes and diminishes in MII oocytes (D-F). Scale bar, 5  $\mu\text{m}$ .

735

736 **Supplementary Figure 6: Short- and long-term treatment of human oocytes with**  
737 **nocodazole.** Representative fluorescence images of oocytes exposed to DMSO (control) and  
738 nocodazole (+/- addition of verapamil) during overnight maturation from GV stage (A) and 1-hour  
739 treatment of MII arrested oocytes (B). Overviews (top row; cell outline is dashed) and spindle area  
740 details (bottom row) of oocytes with (immuno)labeled microtubules (magenta) and chromosomes  
741 (blue) are shown. Scale bar, 10  $\mu\text{m}$

742

#### 743 **Supplementary Table**

744 Overview of analyzed human oocyte samples.

745

746

747

748

749

750

751

752

753

754

755

756 **Figure 1**

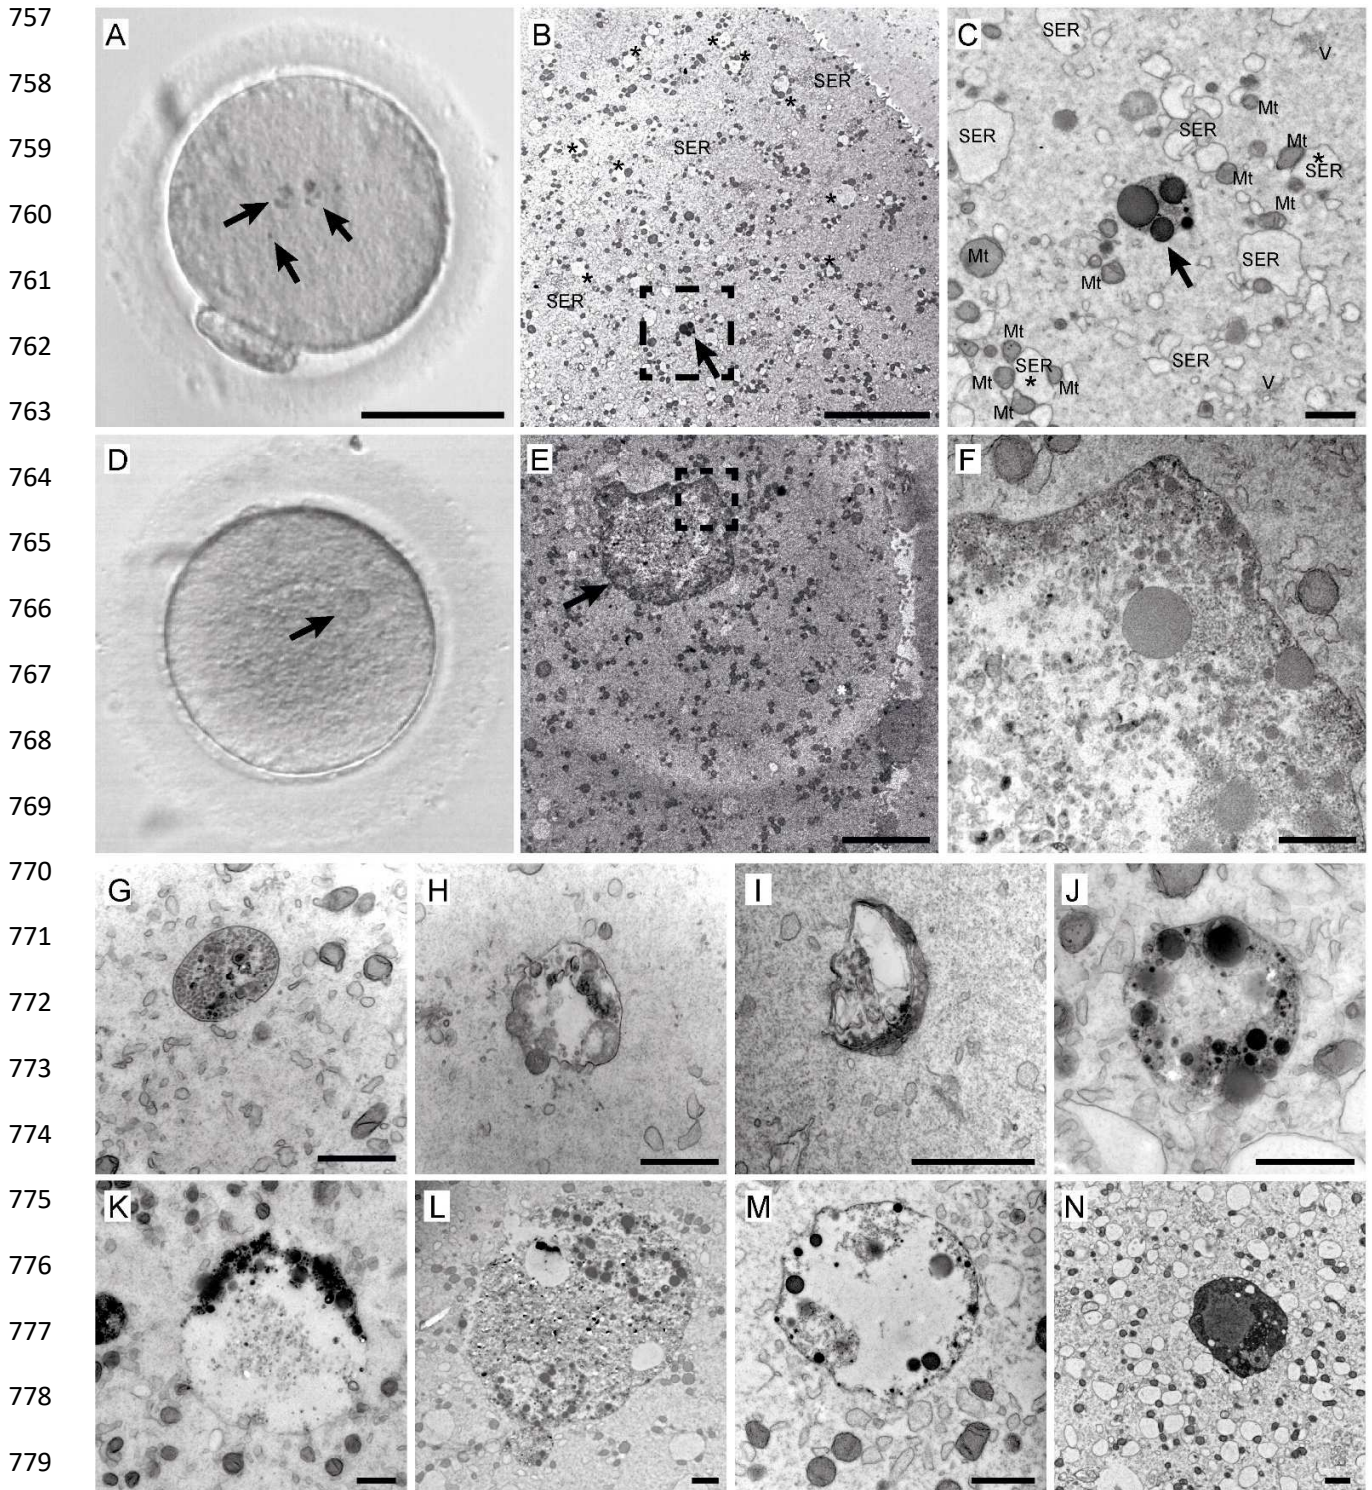

780

781

782

## Figure 2

783

784

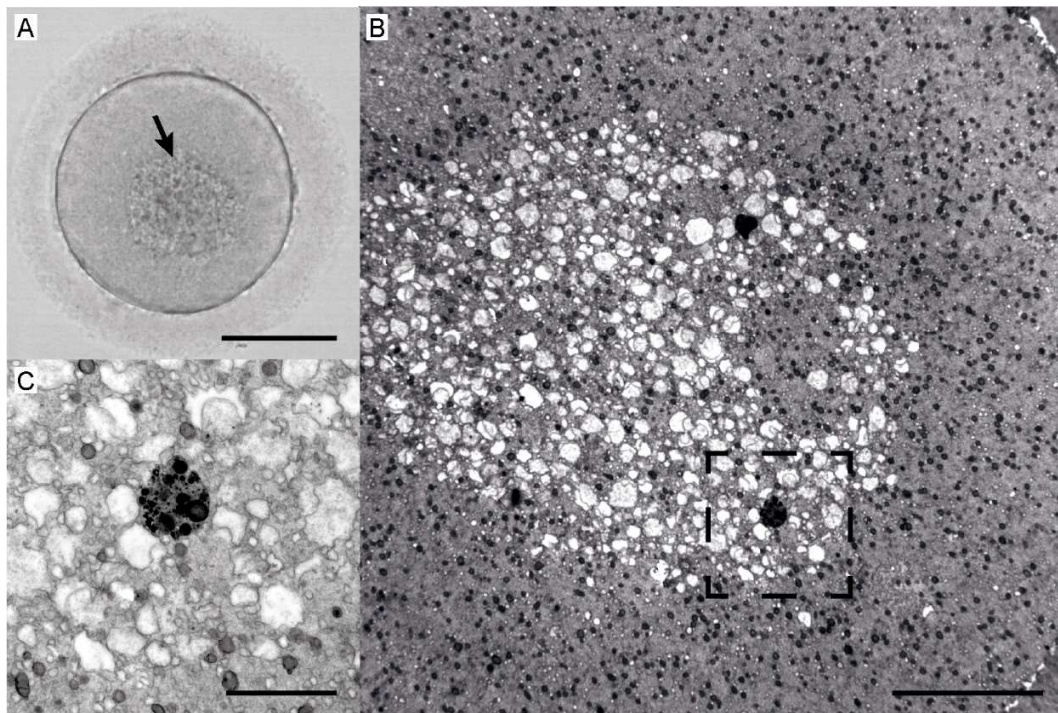

## Figure 3

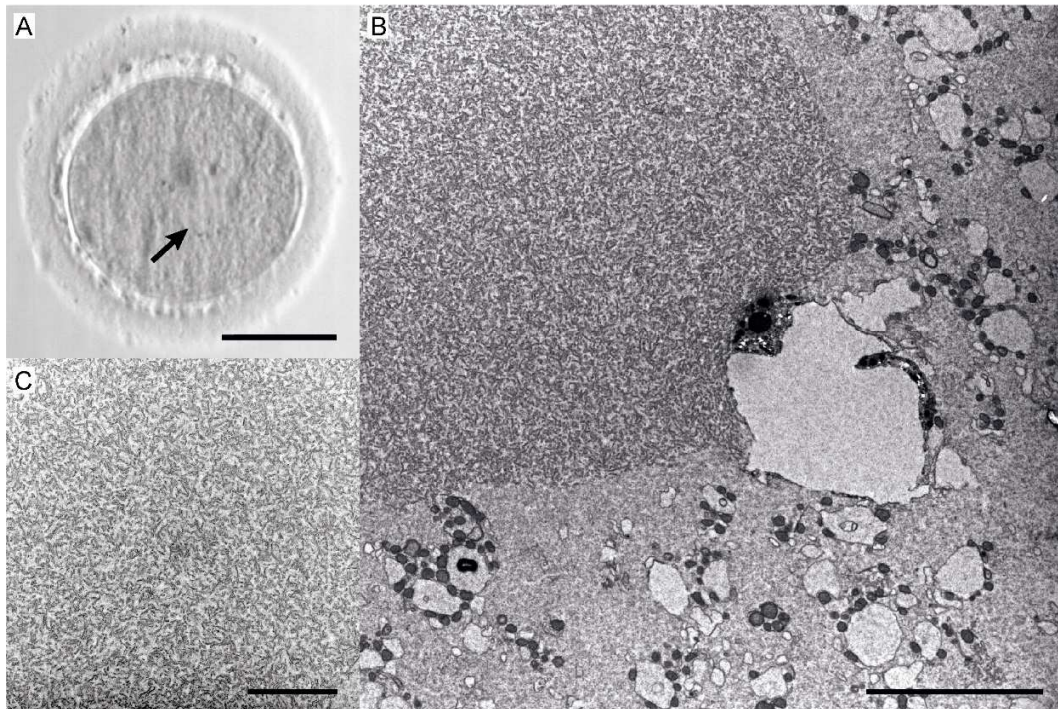

Figure 4

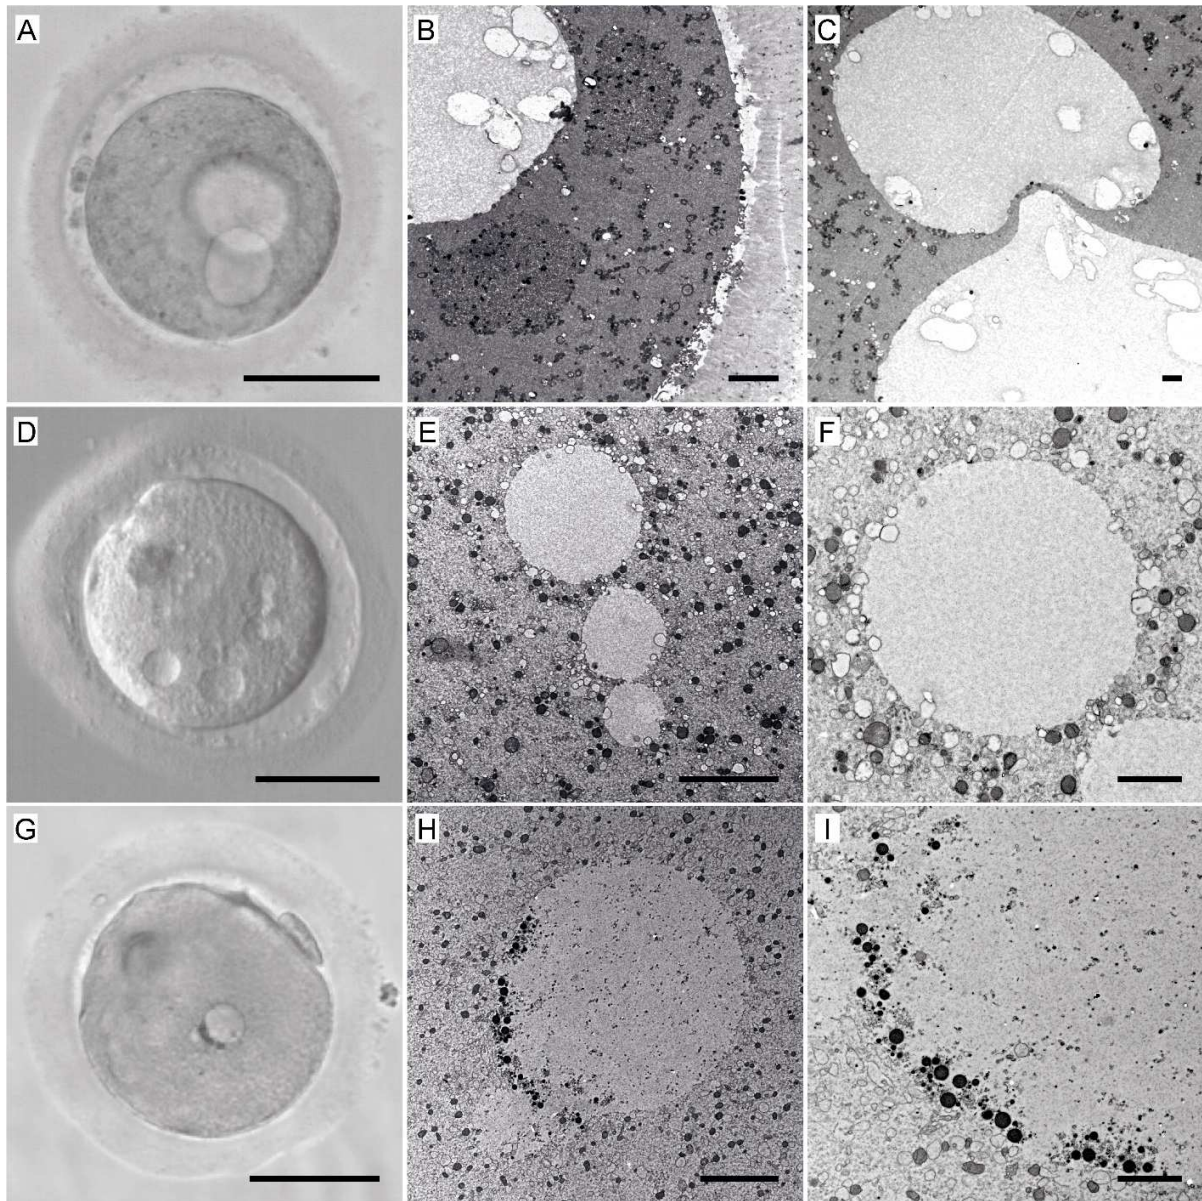

785

786

787

788



Figure 5

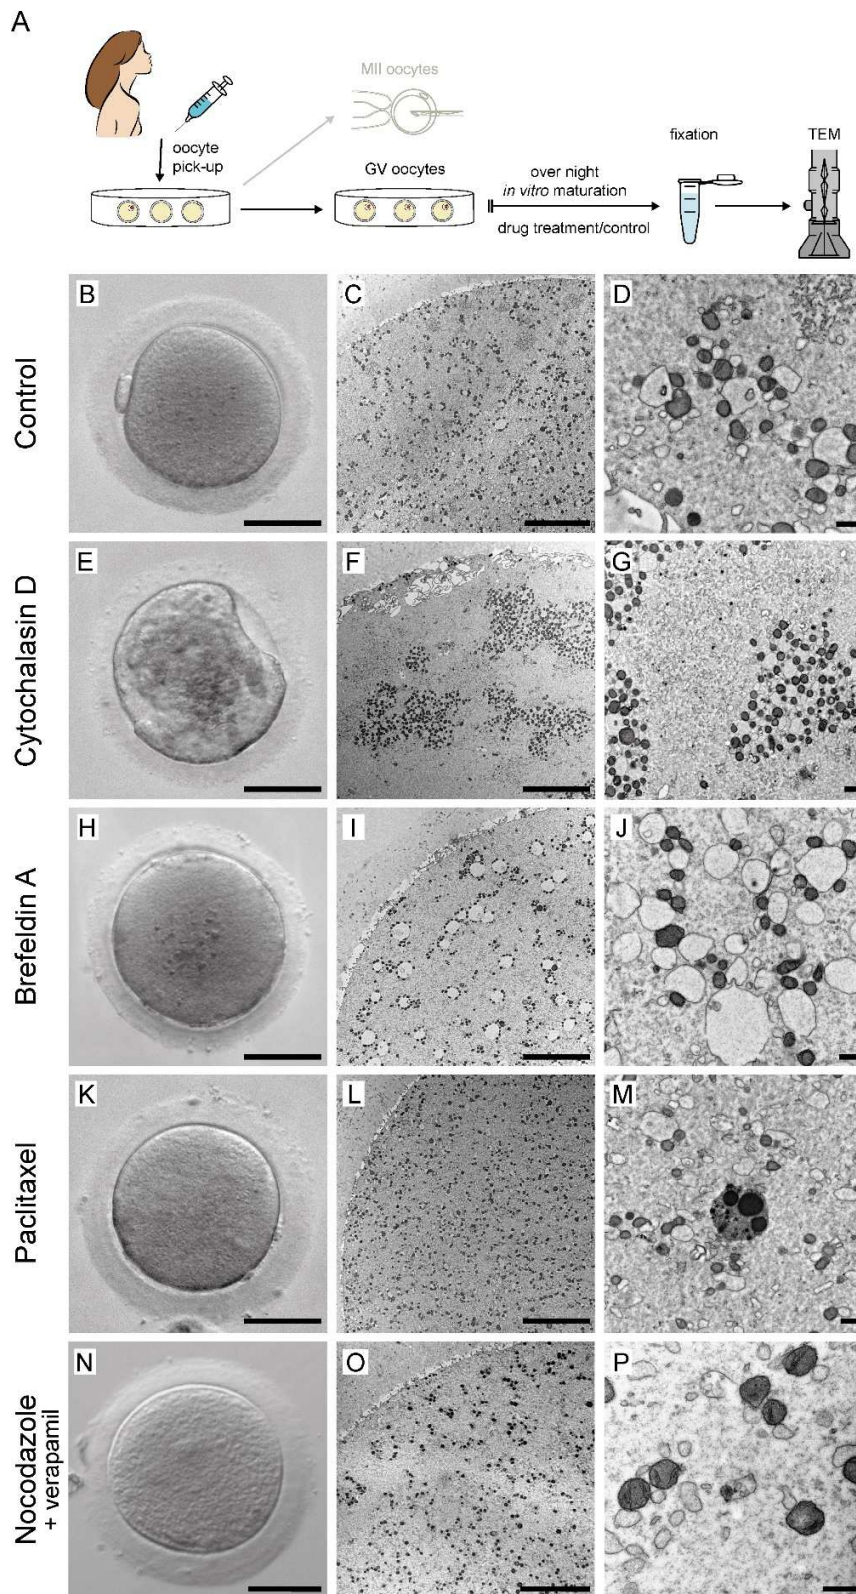

## Figure 6

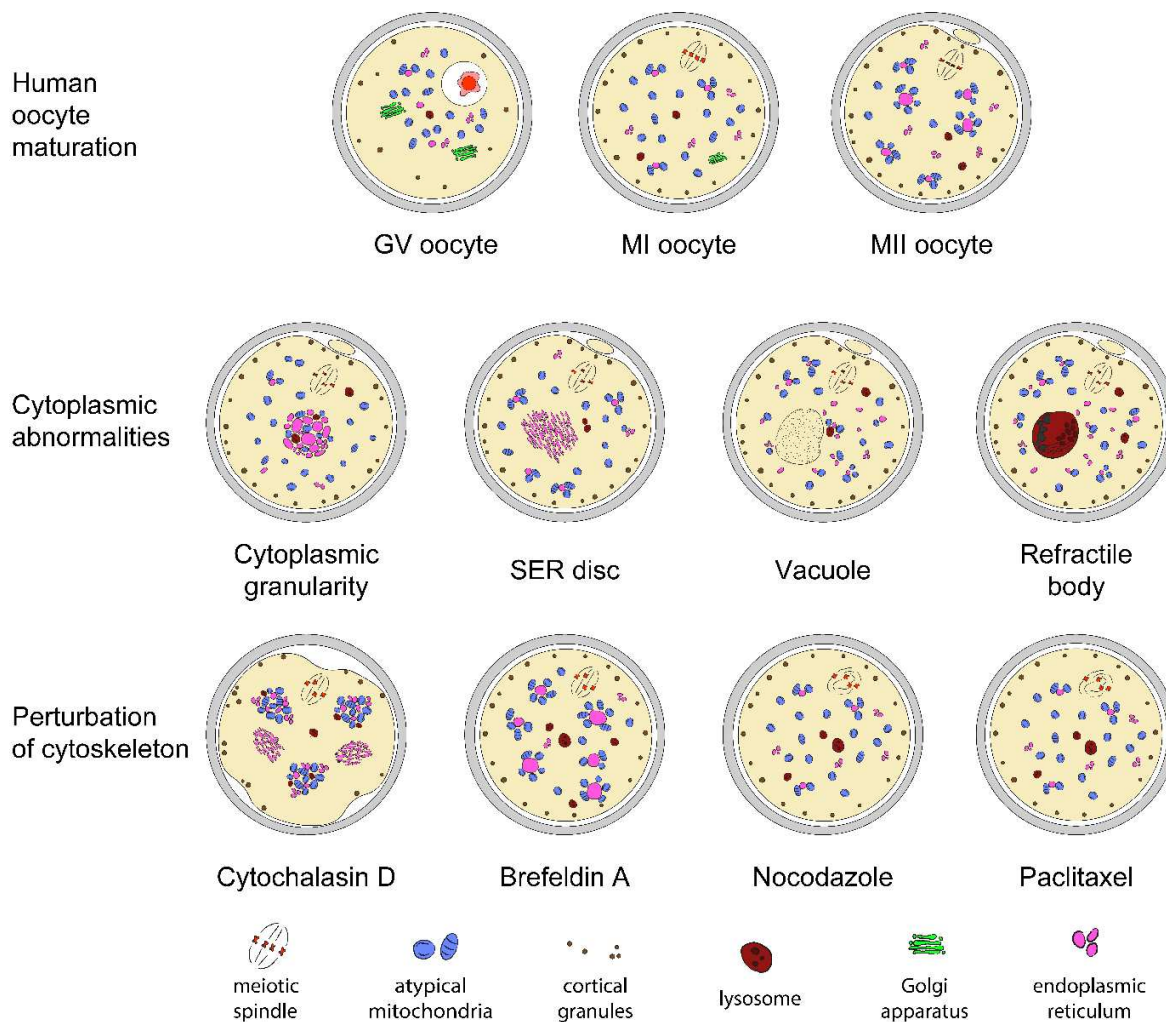

790

791

792

793

794

795

796

797

798

799 **Supplementary Figure 1**

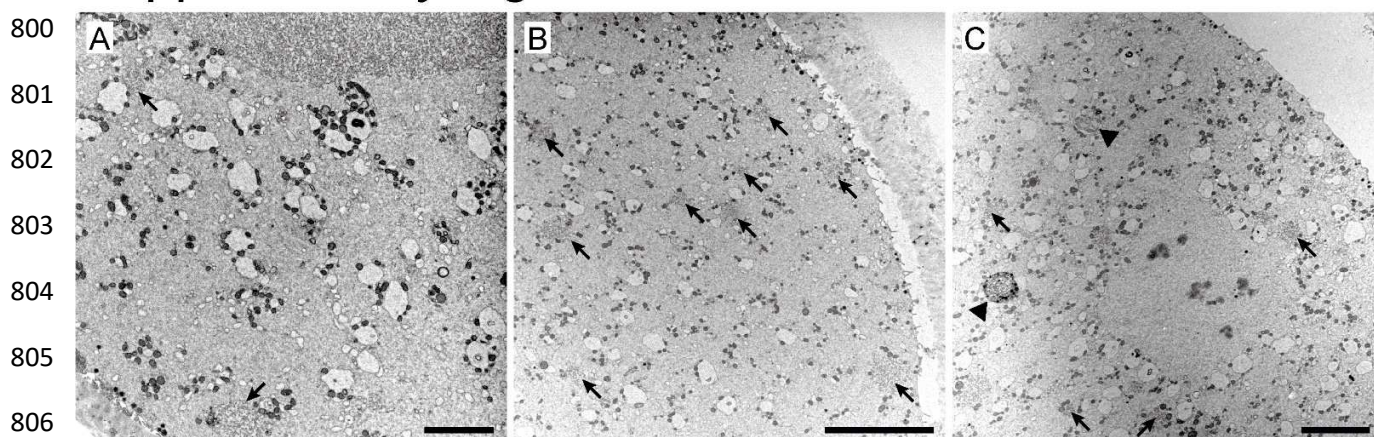

807

808 **Supplementary Figure 2**

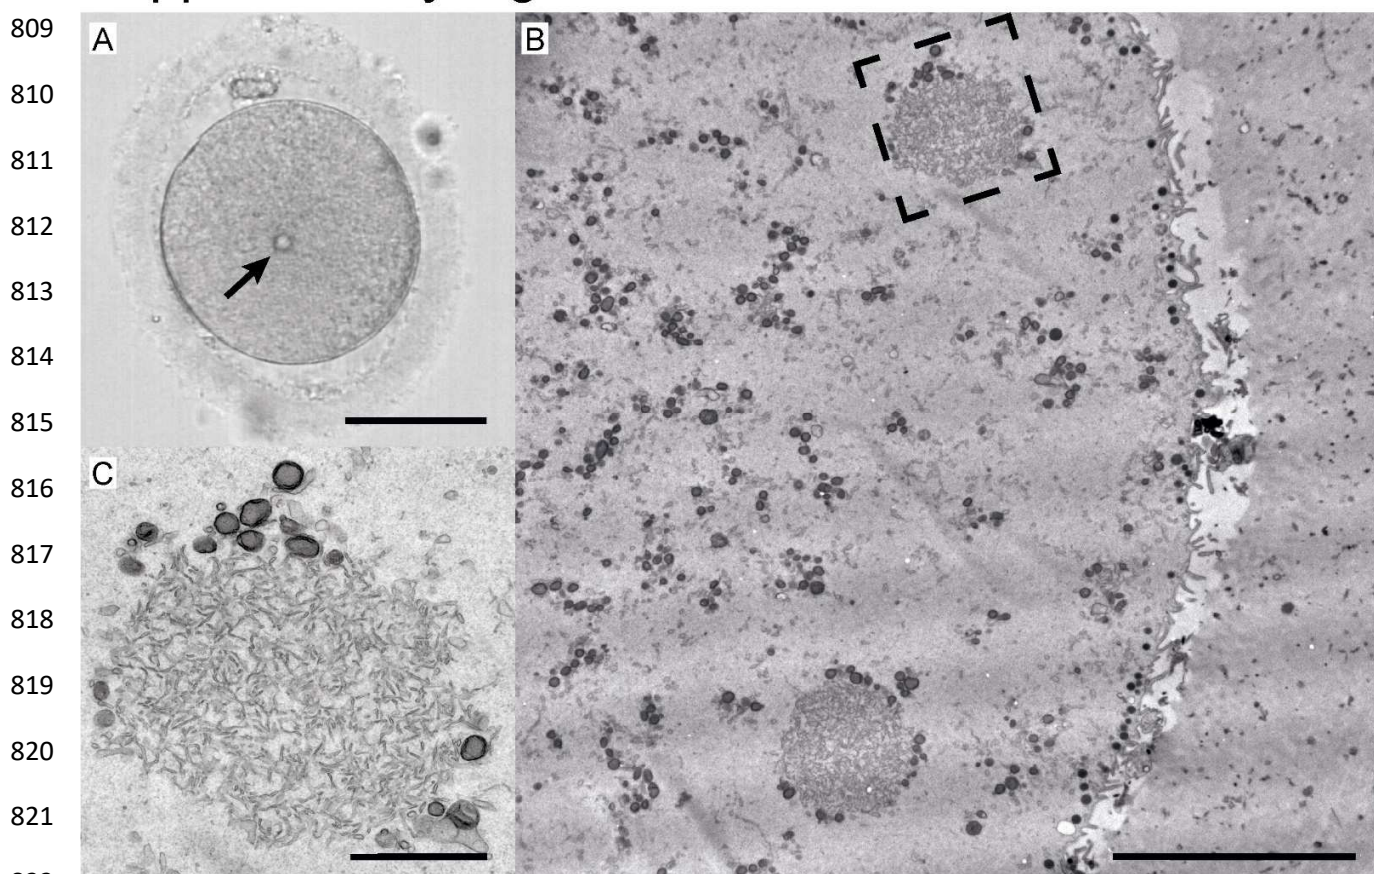

823

824

## Supplementary Figure 3

825  
826  
827  
828  
829  
830  
831

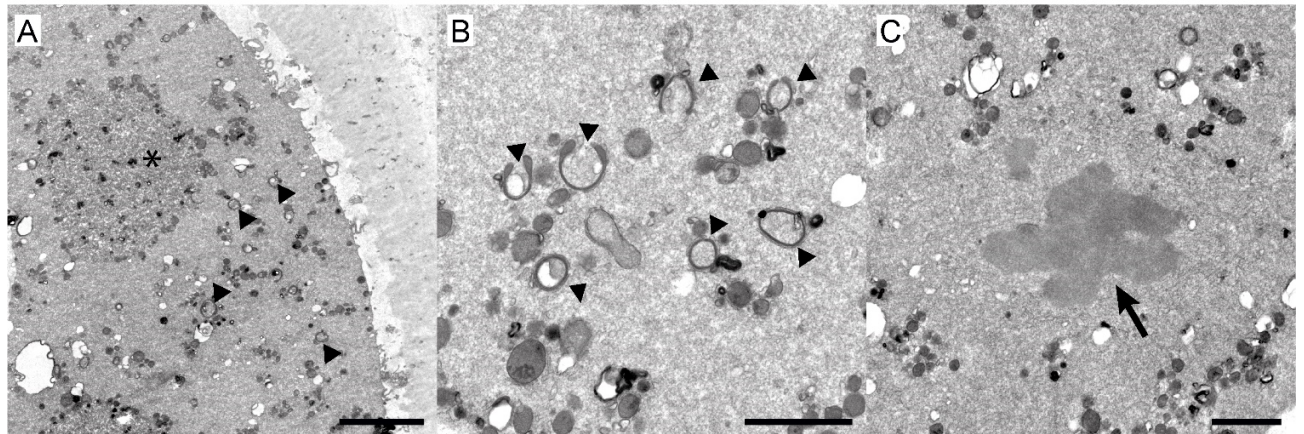

## Supplementary Figure 4

A

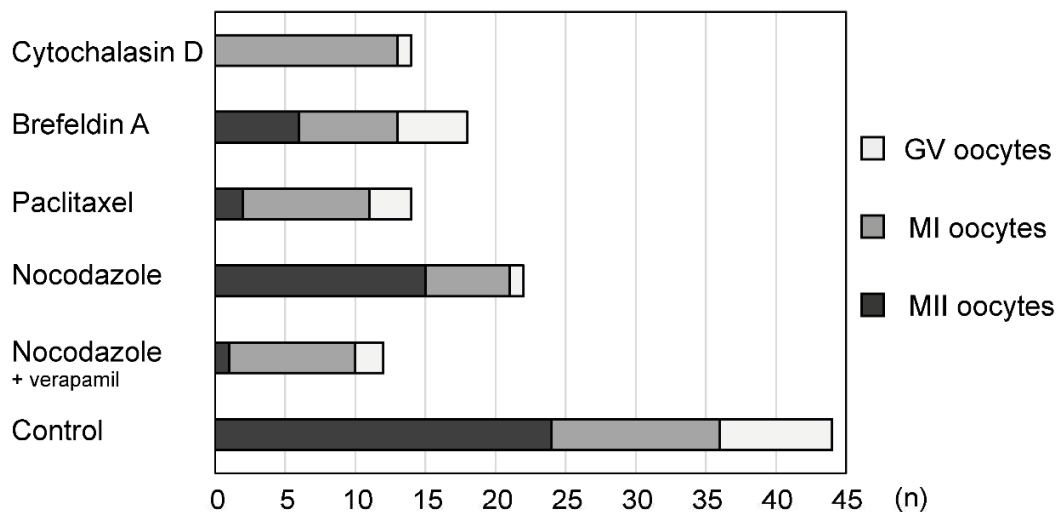

B

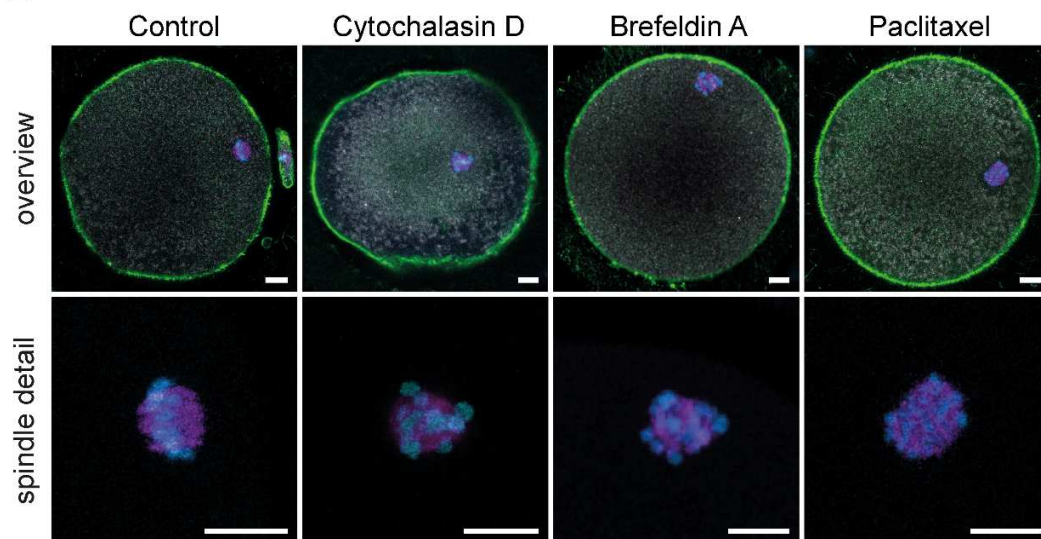

832

833

834

835

836

837

838

## Supplementary Figure 5

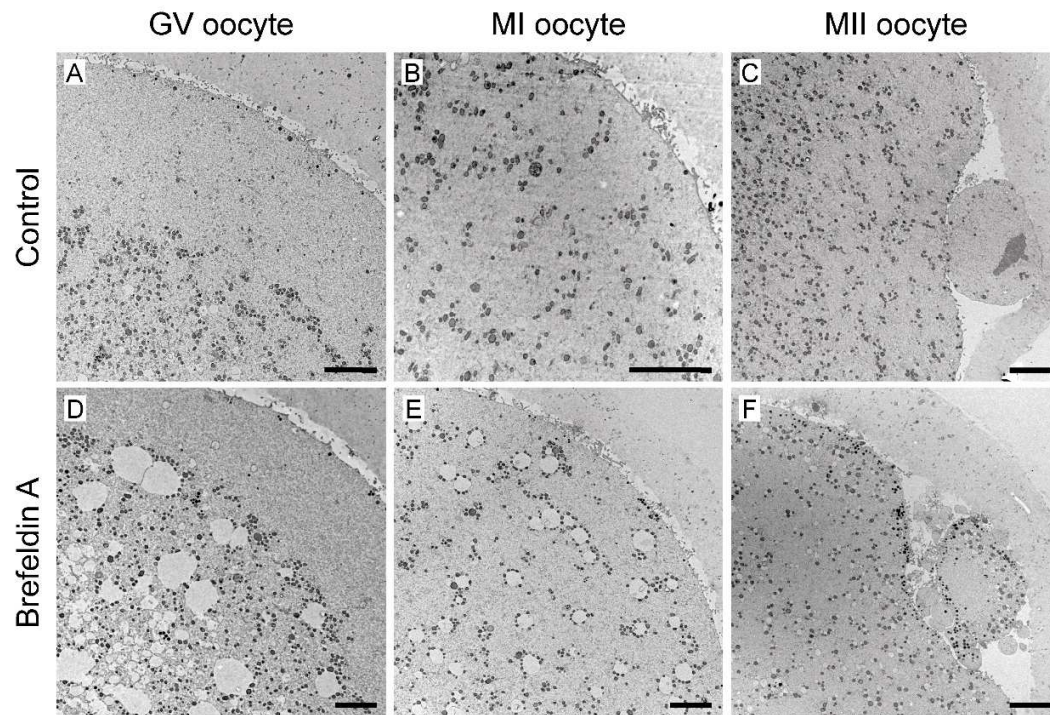

839

840

841

842

843

844

845

846

847

848

849

850

851

## Supplementary Figure 6

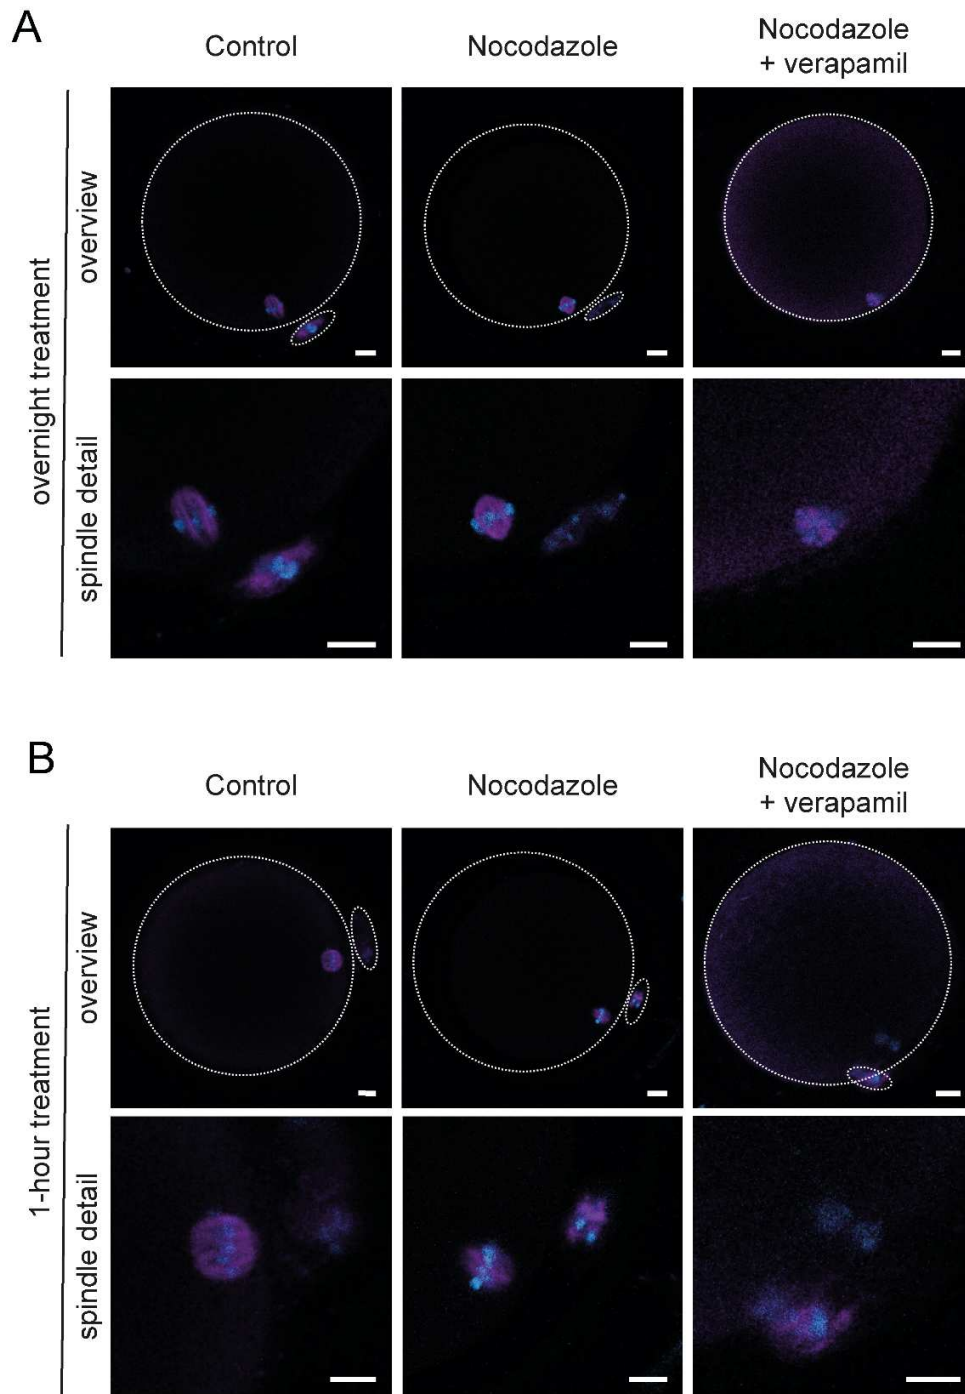

852

853

854

## Supplementary Table

### A) Dysmorphic egg samples

| #        | Donor             | Age                | Cytoplasmic abnormalities |          |             |          |
|----------|-------------------|--------------------|---------------------------|----------|-------------|----------|
|          |                   |                    | Refractile bodies         | Vacuoles | Granularity | SER disc |
| 1        | healthy egg donor | 20                 | +                         | +        |             |          |
| 2        | healthy egg donor | 28                 | +                         | +        |             |          |
| 3        | healthy egg donor | 29                 | +                         |          |             |          |
| 4        | healthy egg donor | 29                 | +                         | +        |             |          |
| 5        | IVF patient       | 33                 | +                         |          |             |          |
| 6        | IVF patient       | 33                 | +                         |          |             |          |
| 7        | IVF patient       | 42                 | +                         |          |             |          |
| 8        | IVF patient       | 42                 | +                         |          |             |          |
| 9        | healthy egg donor | 32                 |                           |          | +           |          |
| 10       | healthy egg donor | 32                 |                           |          | +           |          |
| 11       | healthy egg donor | 32                 | +                         |          | +           |          |
| 12       | healthy egg donor | 32                 | +                         |          | +           |          |
| 13       | healthy egg donor | 23                 |                           |          | +           |          |
| 14       | healthy egg donor | 22                 | +                         | +        |             |          |
| 15       | healthy egg donor | 32                 | +                         | +        |             |          |
| 16       | healthy egg donor | 20                 | +                         | +        |             |          |
| 17       | healthy egg donor | 29                 | +                         | +        |             |          |
| 18       | healthy egg donor | 19                 | +                         | +        |             | +        |
| 19       | healthy egg donor | 21                 | +                         | +        |             |          |
| 20       | healthy egg donor | 30                 | +                         |          | +           |          |
| 21       | IVF patient       | 30                 |                           | +        |             |          |
| 22       | healthy egg donor | 25                 | +                         | +        |             |          |
| Total    |                   |                    | 18                        | 11       | 6           | 1        |
| Mean age |                   | 28.86 ± 6.20 years |                           |          |             |          |

\* oocyte # 2, 3 and 14 contained mid-sized SER aggregates

### B) Samples used for inhibition experiments

|                        | Number of samples |    |       | Donors |             |
|------------------------|-------------------|----|-------|--------|-------------|
|                        | TEM               | IF | Total | Number | Mean age    |
| Cytochalasin D         | 10                | 4  | 14    | 11     | 26.36       |
| Brefeldin A            | 12                | 6  | 18    | 11     | 26.55       |
| Paclitaxel             | 12                | 2  | 14    | 9      | 24.89       |
| Nocodazole             | 0                 | 27 | 27    | 17     | 26.11       |
| Nocodazole + Verapamil | 11                | 4  | 15    | 8      | 27.13       |
| Control                | 30                | 14 | 45    | 32     | 26.97       |
| Total                  |                   |    | 133   | 88     | 26.39 years |

855
